# Supplementary material for: Complete genome sequence of the hyperthermophilic archaeon Thermococcus kodakaraensis KOD1 and comparison with Pyrococcus genomes
Source: HighWire-hosted journal article supplement (doi:10.1101/gr.3003105), 2005-02-14
Supplement: SupplTable1.pdf [file SupplTable1.pdf]

Supplemental Table 1. Predicted protein function for each CDS in the *Thermococcus kodakaraensis* KOD1 genome.

## DNA metabolism

### Chromosome-associated proteins

|        |                                        |
|--------|----------------------------------------|
| TK0560 | Archaeal chromatin protein, Alba       |
| TK1413 | Archaeal histone A                     |
| TK1574 | Histone acetyltransferase Elp3 homolog |
| TK2289 | Archaeal histone B                     |

### Replication

|        |                                                                   |
|--------|-------------------------------------------------------------------|
| TK0001 | DNA-directed DNA polymerase, family B; two inteins                |
| TK0470 | Reverse gyrase; intein                                            |
| TK0535 | DNA polymerase sliding clamp (proliferating cell nuclear antigen) |
| TK0798 | Type II DNA topoisomerase VI, subunit A                           |
| TK0799 | Type II DNA topoisomerase VI, subunit B                           |
| TK0805 | Ribonuclease HII                                                  |
| TK1091 | DNA topoisomerase I; intein                                       |
| TK1281 | Flap structure-specific endonuclease                              |
| TK1410 | DnaG-related protein, containing Toprim domain                    |
| TK1411 | DnaG-related small protein, containing Toprim domain              |
| TK1620 | DNA replication licensing factor, MCM2/3/5 family; two inteins    |
| TK1790 | Eukaryotic-type DNA primase, large subunit                        |
| TK1791 | Eukaryotic-type DNA primase, small subunit                        |
| TK1901 | Cell division control protein 6 homolog                           |
| TK1902 | DNA polymerase II, small subunit                                  |
| TK1903 | DNA polymerase II, large subunit; intein                          |
| TK1959 | Replication factor A complex, RPA32 subunit                       |
| TK1960 | Replication factor A complex, RPA14 subunit                       |
| TK1961 | Replication factor A complex, RPA41 subunit                       |
| TK2140 | ATP-dependent DNA ligase                                          |
| TK2218 | Replication factor C, small subunit; intein                       |
| TK2219 | Replication factor C, large subunit                               |

### Recombination and repair

|        |                                                              |
|--------|--------------------------------------------------------------|
| TK0069 | Predicted exonuclease, RecB family                           |
| TK0170 | Endonuclease IV                                              |
| TK0178 | DNA helicase, UvrD/REP family                                |
| TK0345 | 3-Methyladenine DNA glycosylase                              |
| TK0447 | Hypothetical protein, conserved, RAMP superfamily            |
| TK0450 | DEAD/DEAH box helicase                                       |
| TK0452 | Hypothetical protein, conserved, RAMP superfamily            |
| TK0458 | Predicted exonuclease, RecB family                           |
| TK0460 | DEAD/DEAH box helicase, fused to N-terminal HD domain        |
| TK0461 | Hypothetical protein, conserved, RAMP superfamily            |
| TK0464 | Hypothetical protein, conserved, RAMP superfamily            |
| TK0682 | MutS-like DNA mismatch repair ATPase                         |
| TK0777 | Integrase/recombinase                                        |
| TK0784 | ERCC2/XPD/Rad3-related DNA repair helicase                   |
| TK0906 | Endonuclease V (deoxyinosine 3'-endonuclease)                |
| TK0928 | Predicted DNA/RNA repair helicase                            |
| TK0951 | XPA-binding protein 1 homolog                                |
| TK1021 | Helicase-associated endonuclease for fork-structured DNA     |
| TK1141 | Endonuclease III (DNA-(apurinic or apyrimidinic site) lyase) |
| TK1165 | Predicted AP endonuclease                                    |
| TK1175 | Archaeal type Holliday junction resolvase                    |
| TK1252 | ssDNA-specific exonuclease                                   |
| TK1865 | Predicted AP endonuclease                                    |
| TK1899 | RadA/Rad51 recombinase; intein                               |
| TK1914 | Exonuclease SbcD homolog                                     |
| TK1971 | Methylated-DNA-protein-cysteine S-methyltransferase          |
| TK2111 | Nucleoside triphosphate phosphohydrolase, Ham1p homolog      |
| TK2143 | Uracil-DNA glycosylase                                       |
| TK2210 | 5'-3' Nuclease, encoded next to Rad50 and Mre11 homologs     |
| TK2211 | DNA double-strand break repair ATPase Rad50 homolog          |
| TK2212 | DNA repair exonuclease Rad32/Mre11 homolog                   |
| TK2213 | Bipolar DNA helicase                                         |
| TK2231 | RadB recombinase                                             |
| TK2253 | Hypothetical protein, conserved, RAMP superfamily            |
| TK2284 | Probable 8-oxo-dGTPase, MutT homolog, NUDIX hydrolase family |

### DNA degradation and restriction

|        |                                                                        |
|--------|------------------------------------------------------------------------|
| TK0008 | Predicted DNA methylase                                                |
| TK0155 | RecJ-like exonuclease, containing OB-fold nucleic acid-binding domains |
| TK0317 | TatD-related deoxyribonuclease                                         |
| TK0794 | Putative 5-methylcytosine restriction system, catalytic subunit        |
| TK0795 | Putative 5-methylcytosine restriction system, GTPase subunit           |
| TK1009 | Putative 5-methylcytosine restriction system, GTPase subunit           |
| TK1010 | Putative 5-methylcytosine restriction system, catalytic subunit        |
| TK1034 | Predicted restriction endonuclease                                     |
| TK1147 | Predicted type II restriction endonuclease                             |
| TK1158 | Predicted endonuclease-methyltransferase fusion protein                |
| TK1250 | Intein/rRNA intron-related DNA endonuclease                            |
| TK1460 | Predicted endonuclease-methyltransferase fusion protein                |
| TK1863 | Predicted N6-adenine-specific DNA methylase                            |
| TK1933 | Predicted DNA methylase                                                |

TK2239      PhoI-related type II restriction endonuclease

## Transcription

### *RNA polymerase*

TK0616      DNA-directed RNA polymerase, subunit P  
TK0901      DNA-directed RNA polymerase, subunit F  
TK1081      DNA-directed RNA polymerase, subunit A"  
TK1082      DNA-directed RNA polymerase, subunit A'  
TK1083      DNA-directed RNA polymerase, subunit B  
TK1084      DNA-directed RNA polymerase, subunit H  
TK1167      DNA-directed RNA polymerase, subunit L  
TK1498      DNA-directed RNA polymerase, subunit K  
TK1499      DNA-directed RNA polymerase subunit N  
TK1503      DNA-directed RNA polymerase, subunit D  
TK1698      DNA-directed RNA polymerase subunit E"  
TK1699      DNA-directed RNA polymerase, subunit E'

### *Transcription factors*

TK0132      TATA box-binding protein (transcription initiation factor TFIID)  
TK0533      Archaeal transcription factor S  
TK1079      Transcription termination-antitermination factor, NusA homolog  
TK1172      TBP-interacting protein  
TK1199      TBP-interacting protein Tip49 homolog  
TK1280      Transcription initiation factor IIB  
TK1419      Transcription antitermination protein  
TK1973      Transcription factor, nascent polypeptide-associated complex (NAC) alpha homolog  
TK2024      Transcription initiation factor IIE, alpha subunit  
TK2287      Transcription initiation factor IIB

## Translation

### *Ribosomal proteins - large subunit*

TK0615      LSU ribosomal protein L37AE  
TK0902      LSU ribosomal protein L21E  
TK0969      LSU ribosomal protein L35AE  
TK0975      LSU ribosomal protein L37E  
TK1080      LSU ribosomal protein L30E  
TK1098      LSU ribosomal protein L44E  
TK1309      LSU ribosomal protein L24E  
TK1311      LSU ribosomal protein L7AE  
TK1319      LSU ribosomal protein L39E  
TK1320      LSU ribosomal protein L31E  
TK1322      LSU ribosomal protein L20A  
TK1415      LSU ribosomal protein L12A  
TK1416      LSU ribosomal protein L10E  
TK1417      LSU ribosomal protein L1P  
TK1418      LSU ribosomal protein L11P  
TK1454      LSU ribosomal protein L15E  
TK1495      LSU ribosomal protein L40E  
TK1501      LSU ribosomal protein L13P  
TK1502      LSU ribosomal protein L18E  
TK1513      LSU ribosomal protein L14E  
TK1515      LSU ribosomal protein L34E  
TK1519      LSU ribosomal protein L15P  
TK1520      LSU ribosomal protein L30P  
TK1522      LSU ribosomal protein L18P  
TK1523      LSU ribosomal protein L19E  
TK1524      LSU ribosomal protein L32E  
TK1525      LSU ribosomal protein L6P  
TK1528      LSU ribosomal protein L5P  
TK1530      LSU ribosomal protein L24P  
TK1531      LSU ribosomal protein L14P  
TK1535      LSU ribosomal protein L29P  
TK1537      LSU ribosomal protein L22P  
TK1539      LSU ribosomal protein L2P  
TK1540      LSU ribosomal protein L23P  
TK1541      LSU Ribosomal protein L4P  
TK1542      LSU ribosomal protein L3P  
TK1546      LSU ribosomal protein L10E  
TK1915      LSU ribosomal protein L41E

### *Ribosomal proteins - small subunit*

TK0307      SSU ribosomal protein S10P  
TK1077      SSU ribosomal protein S7  
TK1078      SSU ribosomal protein S12  
TK1099      SSU ribosomal protein S27E  
TK1191      SSU ribosomal protein S8E  
TK1251      SSU ribosomal protein S15P  
TK1254      SSU ribosomal protein S3AE  
TK1276      SSU ribosomal protein S19E  
TK1310      SSU ribosomal protein S28E  
TK1496      SSU ribosomal protein S2P  
TK1500      SSU ribosomal protein S9P  
TK1504      SSU ribosomal protein S11P  
TK1505      SSU ribosomal protein S4P  
TK1506      SSU ribosomal protein S13P  
TK1521      SSU ribosomal protein S5P  
TK1526      SSU ribosomal protein S8P

|                                              |                                                                                                  |
|----------------------------------------------|--------------------------------------------------------------------------------------------------|
| TK1527                                       | SSU ribosomal protein S14P                                                                       |
| TK1529                                       | SSU ribosomal protein S4E                                                                        |
| TK1532                                       | SSU ribosomal protein S17P                                                                       |
| TK1536                                       | SSU ribosomal protein S3P                                                                        |
| TK1538                                       | SSU ribosomal protein S19P                                                                       |
| TK1695                                       | SSU ribosomal protein S27AE                                                                      |
| TK1696                                       | SSU ribosomal protein S24E                                                                       |
| TK1951                                       | SSU ribosomal protein S6E                                                                        |
| TK2292                                       | SSU ribosomal protein S17E                                                                       |
| <i>tRNA aminoacylation</i>                   |                                                                                                  |
| TK0444                                       | Cysteinyl-tRNA synthetase                                                                        |
| TK0492                                       | Aspartyl-tRNA synthetase                                                                         |
| TK0550                                       | Prolyl-tRNA synthetase                                                                           |
| TK0568                                       | Tyrosyl-tRNA synthetase                                                                          |
| TK0759                                       | Asparaginyl-tRNA synthetase                                                                      |
| TK0908                                       | Archaeal Glu-tRNA(Gln) amidotransferase, subunit D                                               |
| TK0911                                       | Archaeal Glu-tRNA(Gln) amidotransferase, subunit E containing GAD domain                         |
| TK0921                                       | Phenylalanyl-tRNA synthetase, alpha subunit                                                      |
| TK0925                                       | Phenylalanyl-tRNA synthetase, beta subunit                                                       |
| TK0978                                       | Glycyl-tRNA synthetase                                                                           |
| TK1049                                       | Methionyl-tRNA synthetase                                                                        |
| TK1140                                       | Seryl-tRNA synthetase                                                                            |
| TK1170                                       | Threonyl-tRNA synthetase                                                                         |
| TK1235                                       | Arginyl-tRNA synthetase                                                                          |
| TK1274                                       | Valyl-tRNA synthetase                                                                            |
| TK1408                                       | Glutamyl-tRNA synthetase                                                                         |
| TK1461                                       | leucyl-tRNA synthetase                                                                           |
| TK1562                                       | Histidyl-tRNA synthetase                                                                         |
| TK1567                                       | Alanyl-tRNA synthetase                                                                           |
| TK1748                                       | Isoleucyl-tRNA synthetase                                                                        |
| TK1874                                       | Tryptophanyl-tRNA synthetase                                                                     |
| TK2240                                       | Lysyl-tRNA synthetase                                                                            |
| TK2300                                       | Peptidyl-tRNA hydrolase                                                                          |
| <i>tRNA/rRNA modification and processing</i> |                                                                                                  |
| TK0031                                       | Ribonuclease P component, Rpp21 homolog                                                          |
| TK0183                                       | snoRNP component, Fibrillarin homolog                                                            |
| TK0184                                       | snoRNP component, Nop56p/58p homolog                                                             |
| TK0233                                       | Ribosomal protein-serine acetyltransferase RimL homolog                                          |
| TK0302                                       | RNA 2'-phosphotransferase                                                                        |
| TK0360                                       | tRNA/rRNA cytosine-C5-methylase, NOL1/NOP2/Sun family                                            |
| TK0422                                       | tRNA m1G methyltransferase                                                                       |
| TK0617                                       | U3 snoRNP component, archaeal imp4 homolog, containing Brix domain                               |
| TK0760                                       | Archaeosine tRNA-guanine transglycosylase                                                        |
| TK0773                                       | Predicted ATP-dependent endonuclease, OLD family                                                 |
| TK0872                                       | tRNA/rRNA cytosine-C5-methylase, NOL1/NOP2/Sun family                                            |
| TK0876                                       | Ribosome biogenesis protein Nep1p homolog, suppressor Mral family                                |
| TK0899                                       | Dimethyladenosine transferase (16S rRNA dimethylase)                                             |
| TK0927                                       | tRNA pseudouridine synthase A                                                                    |
| TK0970                                       | N2,N2-Dimethylguanosine tRNA methyltransferase                                                   |
| TK0981                                       | N2,N2-Dimethylguanosine tRNA methyltransferase                                                   |
| TK1114                                       | Ribonuclease Z                                                                                   |
| TK1116                                       | 23S rRNA (uracil-5-)-methyltransferase                                                           |
| TK1328                                       | tRNA (1-methyladenosine) methyltransferase                                                       |
| TK1395                                       | Predicted ATP-dependent endonuclease, OLD family                                                 |
| TK1428                                       | Cleavage and polyadenylation specificity factor subunit homolog                                  |
| TK1450                                       | Ribonuclease P component, Rpp30 homolog                                                          |
| TK1451                                       | Predicted exosome subunit, DUF54 family                                                          |
| TK1507                                       | Ribosomal RNA small subunit methyltransferase C                                                  |
| TK1509                                       | tRNA pseudouridine synthase B                                                                    |
| TK1533                                       | Ribonuclease P component, Rpp29 homolog                                                          |
| TK1615                                       | RNA 3'-terminal phosphate cyclase                                                                |
| TK1633                                       | Exosome subunit Rrp42p homolog, 3'-5' exoribonuclease                                            |
| TK1634                                       | Exosome subunit Rrp41p homolog, 3'-5' exoribonuclease                                            |
| TK1635                                       | Exosome subunit Rrp4p homolog, RNA-binding protein                                               |
| TK1636                                       | Predicted exosome subunit, UPF0023 family                                                        |
| TK1738                                       | 2'-5' RNA ligase                                                                                 |
| TK1741                                       | tRNA nucleotidyltransferase (CCA-adding enzyme)                                                  |
| TK1767                                       | Ribonuclease P component, Rpp14 homolog                                                          |
| TK1785                                       | Probable tRNA/rRNA methyltransferase                                                             |
| TK1935                                       | tRNA/rRNA cytosine-C5-methylase, NOL1/NOP2/Sun family                                            |
| TK1970                                       | Probable tRNA/rRNA methyltransferase, SpoU family                                                |
| TK2064                                       | Probable 2-methylthioadenine synthetase                                                          |
| TK2122                                       | tRNA/rRNA cytosine-C5-methylase, NOL1/NOP2/Sun family, containing RNA-binding PUA domain         |
| TK2135                                       | 23S rRNA (uracil-5-)-methyltransferase                                                           |
| TK2214                                       | Ribosomal protein-alanine acetyltransferase RimI homolog                                         |
| TK2215                                       | Archaeal tRNA-intron endonuclease                                                                |
| TK2286                                       | snoRNP component, Gar1 homolog                                                                   |
| TK2302                                       | tRNA pseudouridine synthase D                                                                    |
| TK2304                                       | tRNA/rRNA cytosine-C5-methylase, NOL1/NOP2/Sun family, fused to N-terminal NusB regulator domain |
| <i>mRNA processing</i>                       |                                                                                                  |
| TK0976                                       | snRNP component, Sm-like protein                                                                 |
| TK1297                                       | Nonsense-mediated mRNA decay protein NMD3 homolog                                                |
| <i>Translation factors</i>                   |                                                                                                  |

TK0111 Predicted zinc-ribbon RNA-binding protein involved in translation  
 TK0112 Translation elongation factor EF-1, beta subunit  
 TK0185 Translation initiation factor eIF-2B, delta subunit  
 TK0308 Translation elongation factor EF-1, alpha subunit  
 TK0309 Translation elongation factor EF-2  
 TK0556 Translation initiation factor eIF-2B, beta subunit  
 TK0802 Translation initiation factor eIF-1A  
 TK0878 Translation initiation factor eIF-5A  
 TK0948 Putative translation factor Sua5p homolog  
 TK1047 Translation initiation factor eIF-2B, delta subunit  
 TK1100 Translation initiation factor eIF-2, alpha subunit  
 TK1239 Peptide chain release factor eRF1  
 TK1305 Translation initiation factor IF-2; intein  
 TK1321 Translation initiation factor eIF-6  
 TK1534 Protein translation factor SUI1 homolog  
 TK1621 Translation initiation factor eIF-2, beta subunit  
 TK1946 Translation initiation factor eIF-2, gamma subunit

*Helicases with unknown function*

TK0306 DEAD/DEAH box RNA helicase  
 TK0521 DEAD/DEAH box RNA helicase, fused to C-terminal uncharacterized domain  
 TK0566 DEAD/DEAH box RNA helicase  
 TK0764 Large helicase-related protein; intein  
 TK1015 Large helicase-related protein  
 TK1332 RNA helicase Ski2 homolog; intein

**Cellular processes**

*Cell division*

TK0349 ATPase involved in chromosome partitioning, ParA/MinD family  
 TK0378 Chromosome partitioning protein ParB homolog  
 TK0514 Chromosome condensation protein CrcB homolog  
 TK0669 CDC48/VCP homolog, AAA superfamily  
 TK0701 ATPase, ParA/MinD family, containing ferredoxin domains  
 TK0702 ATPase, ParA/MinD family, containing ferredoxin domains  
 TK0915 ATPase involved in chromosome partitioning, ParA/MinD family  
 TK0952 ATPase involved in chromosome partitioning, ParA/MinD family  
 TK0954 Septum formation inhibitor Maf homolog  
 TK0964 Cell division protein pelota homolog  
 TK1017 Chromosome segregation ATPase  
 TK1157 CDC48/VCP homolog, AAA superfamily  
 TK1421 Cell division GTPase  
 TK1669 Cell division GTPase  
 TK2007 ATPase involved in chromosome partitioning, ParA/MinD family, Mrp homolog  
 TK2021 ATPase involved in chromosome partitioning, ParA/MinD family, Mrp homolog  
 TK2137 ATPase involved in chromosome partitioning, ParA/MinD family  
 TK2271 Cell division GTPase  
 TK2272 ATPase involved in chromosome partitioning, ParA/MinD family, Soj homolog

*Signal transduction*

TK0241 Protein-tyrosine phosphatase  
 TK0507 Adenylate cyclase, class 2  
 TK0679 Serine/threonine protein kinase, RIO1 family  
 TK0801 Serine/threonine protein kinase Rio1p homolog  
 TK1113 Predicted signaling protein, TraB family  
 TK1179 Adenylate cyclase, class 2  
 TK2250 Serine/threonine protein kinase, RIO1 family

*Cell motility*

TK0038 Archaeal flagellin B1 precursor  
 TK0039 Archaeal flagellin B2 precursor  
 TK0040 Archaeal flagellin B3 precursor  
 TK0041 Archaeal flagellin B4 precursor  
 TK0042 Archaeal flagellin B5 precursor  
 TK0043 Archaeal flagella-related protein C  
 TK0044 Archaeal flagella-related protein D, internal insertion  
 TK0045 Archaeal flagella-related protein F  
 TK0046 Archaeal flagella-related protein G  
 TK0047 Archaeal flagella-related protein H, predicted ATPase  
 TK0048 Archaeal flagella-related protein I, predicted secretion ATPase  
 TK0049 Archaeal flagella-related membrane protein J, DUF110 family  
 TK0156 Methyl-accepting chemotaxis protein  
 TK0629 Chemotaxis signal transduction protein  
 TK0630 Methyl-accepting chemotaxis protein  
 TK0631 Chemotaxis protein methyltransferase  
 TK0632 Chemotaxis response regulator  
 TK0633 Chemotaxis protein-glutamate methylesterase, containing receiver domain  
 TK0634 Chemotaxis histidine kinase, flame shift  
 TK0635 Chemotaxis histidine kinase, flame shift  
 TK0636 Chemotaxis protein CheC  
 TK0637 Chemotaxis protein CheC  
 TK0638 Methyl-accepting chemotaxis protein  
 TK0639 Chemotaxis protein CheD  
 TK1606 Methyl-accepting chemotaxis protein  
 TK2147 Methyl-accepting chemotaxis protein

*Detoxification*

TK0189 Predicted stress-inducible protein, OsmC/Ohr family  
 TK0304 NADH oxidase

|        |                                                                              |
|--------|------------------------------------------------------------------------------|
| TK0523 | Rubrerythrin                                                                 |
| TK0524 | Rubredoxin                                                                   |
| TK0525 | Superoxide reductase                                                         |
| TK0537 | Peroxiredoxin, AhpC/TSA family                                               |
| TK0815 | Peroxiredoxin, AhpC/TSA family                                               |
| TK0828 | NAD(P)H:rubredoxin oxidoreductase                                            |
| TK0842 | Arsenical-resistance membrane protein                                        |
| TK0843 | Trx-linked arsenate reductase (arsenical pump modifier)                      |
| TK0880 | Arsenical pump membrane protein                                              |
| TK0994 | Arsenical pump-driving ATPase                                                |
| TK1055 | Peroxiredoxin, bacterioferritin comigratory protein homolog, AhpC/TSA family |
| TK1299 | NADH oxidase                                                                 |
| TK1392 | NADH oxidase                                                                 |
| TK2017 | Predicted stress-inducible protein, OsmC/Ohr family                          |
| TK2032 | Periplasmic divalent cation tolerance protein                                |

#### **Protein fate**

##### *Protein and peptide degradation*

|        |                                                                        |
|--------|------------------------------------------------------------------------|
| TK0002 | Predicted zinc-dependent protease, DUF45 family                        |
| TK0160 | D-Aminopeptidase                                                       |
| TK0347 | Predicted membrane-bound serine protease, NfeD homolog                 |
| TK0348 | Predicted membrane protease subunit, stomatin/prohibitin homolog       |
| TK0423 | Prolyl endopeptidase                                                   |
| TK0439 | Membrane-associated metalloprotease, CaaX family                       |
| TK0494 | Bifunctional carboxypeptidase/aminocyclase                             |
| TK0499 | Zinc-dependent protease, TldD/PmbA family                              |
| TK0502 | Zinc-dependent protease, TldD/PmbA family                              |
| TK0512 | Predicted zinc-dependent protease                                      |
| TK0677 | Zinc-dependent protease HtpX homolog, M48 family                       |
| TK0698 | Zinc-dependent protease, TldD/PmbA family                              |
| TK0699 | Zinc-dependent protease, TldD/PmbA family                              |
| TK0752 | Acylamino acid-releasing enzyme (acylaminoacyl-peptidase)              |
| TK0775 | Deblocking aminopeptidase                                              |
| TK0781 | Deblocking aminopeptidase                                              |
| TK0967 | Xaa-Pro aminopeptidase                                                 |
| TK1022 | D-Aminopeptidase                                                       |
| TK1033 | Predicted metalloprotease, containing Jab1/MPN domain                  |
| TK1164 | Predicted endopeptidase IV, S49 family                                 |
| TK1177 | Deblocking aminopeptidase                                              |
| TK1247 | Membrane-associated metallopeptidase, M50 family                       |
| TK1262 | Predicted metalloprotease, containing Jab1/MPN domain                  |
| TK1264 | ATP-dependent protease Lon                                             |
| TK1284 | Intracellular protease I                                               |
| TK1316 | Predicted membrane protease subunit, stomatin/prohibitin homolog       |
| TK1429 | Proteasome, beta subunit                                               |
| TK1455 | Xaa-Pro aminopeptidase                                                 |
| TK1467 | Predicted membrane-associated metallopeptidase, M50 family             |
| TK1637 | Proteasome, alpha subunit                                              |
| TK1820 | Membrane-associated metalloprotease, M50 family, containing PDZ domain |
| TK1835 | Pyrrolidone-carboxylate peptidase                                      |
| TK1840 | Cobalt-activating carboxypeptidase, M32 family                         |
| TK1912 | Aminopeptidase, family M28, containing PA domain                       |
| TK2040 | Microsomal dipeptidase homolog                                         |
| TK2049 | Acylamino acid-releasing enzyme (acylaminoacyl-peptidase)              |
| TK2126 | O-Sialoglycoprotein endopeptidase                                      |
| TK2169 | Zinc-dependent protease, TldD/PmbA family                              |
| TK2170 | Zinc-dependent protease, TldD/PmbA family                              |
| TK2207 | Proteasome, beta subunit 2                                             |
| TK2258 | Zinc-dependent protease HtpX homolog, M48 family                       |

##### *Protein and peptide secretion and trafficking*

|        |                                                                |
|--------|----------------------------------------------------------------|
| TK0053 | Archaeal signal peptidase, A24 family                          |
| TK0653 | Signal recognition particle GTPase                             |
| TK1330 | Signal recognition particle, SRP19 subunit                     |
| TK1420 | Preprotein translocase, SecE subunit                           |
| TK1486 | Signal recognition particle, SRP54 subunit                     |
| TK1518 | Preprotein translocase, SecY subunit                           |
| TK1593 | Protein-export membrane protein SecF                           |
| TK1594 | Protein-export membrane protein SecD                           |
| TK1703 | Signal peptidase I, fused to C-terminal uncharacterized domain |
| TK1853 | Type II/IV secretion system ATPase; intein                     |
| TK1952 | Preprotein translocase, SEC61 beta subunit                     |
| TK2037 | Signal peptidase I                                             |

##### *Protein folding and stabilization*

|        |                                                                                           |
|--------|-------------------------------------------------------------------------------------------|
| TK0441 | FKBP-type peptidyl-prolyl cis-trans isomerase, fused to C-terminal uncharacterized domain |
| TK0643 | Prefoldin, beta subunit                                                                   |
| TK0678 | Chaperonin, alpha subunit (thermosome, alpha subunit)                                     |
| TK1005 | Prefoldin, alpha subunit                                                                  |
| TK1121 | Prefoldin, alpha subunit                                                                  |
| TK1122 | Prefoldin, beta subunit                                                                   |
| TK1155 | Small heat shock protein                                                                  |
| TK1850 | FKBP-type peptidyl-prolyl cis-trans isomerase                                             |
| TK2303 | Chaperonin, beta subunit (thermosome, beta subunit)                                       |

##### *Protein modification and repair*

|        |                                                               |
|--------|---------------------------------------------------------------|
| TK0051 | Protein-L-isoaspartate carboxylmethyltransferase, flame shift |
|--------|---------------------------------------------------------------|

|        |                                                                                   |
|--------|-----------------------------------------------------------------------------------|
| TK0106 | Diphthine synthase, methylase subunit                                             |
| TK0290 | Pyruvate-formate lyase-activating enzyme                                          |
| TK0671 | Deoxyhypusine synthase                                                            |
| TK0722 | Probable protein-S isoprenylcysteine O-methyltransferase                          |
| TK0819 | Peptide methionine sulfoxide reductase                                            |
| TK0838 | Thioredoxin                                                                       |
| TK0893 | Pyruvate fromate-lyase activating enzyme-related protein, radical SAM superfamily |
| TK0961 | Hydrogenase expression/formation protein HypE                                     |
| TK1032 | Hydrogenase expression/formation protein HypE                                     |
| TK1085 | Protein disulfide oxidoreductase                                                  |
| TK1183 | Methionyl aminopeptidase                                                          |
| TK1198 | Organic radical activating enzyme, radical SAM superfamily                        |
| TK1673 | N5-Glutamine methyltransferase, HemK family                                       |
| TK1928 | Diphthine synthase, DPH2 subunit                                                  |
| TK1993 | Hydrogenase expression/formation protein HypE                                     |
| TK1997 | Hydrogenase maturation protein HypF                                               |
| TK2000 | Hydrogenase expression/formation protein hypD                                     |
| TK2001 | Hydrogenase expression/formation protein HypC                                     |
| TK2004 | Hydrogenase maturation protease HycI                                              |
| TK2008 | Hydrogenase nickel-incorporation protein HypA                                     |
| TK2066 | Hydrogenase-specific maturation endopeptidase                                     |
| TK2100 | Thioredoxin reductase                                                             |

## Regulatory functions

### *Transcription regulators*

|        |                                                                                                      |
|--------|------------------------------------------------------------------------------------------------------|
| TK0017 | Predicted transcription regulator, SpoVT/AbrB family                                                 |
| TK0107 | Manganese-dependent transcription regulator                                                          |
| TK0126 | Predicted transcription regulator, containing DNA-binding HTH domain                                 |
| TK0142 | Predicted transcription regulator, containing cell wall binding repeat 2 and DNA-binding HTH domains |
| TK0151 | Transcription regulator, PspC family                                                                 |
| TK0168 | Predicted transcription regulator, Lrp/AsnC family                                                   |
| TK0169 | Predicted transcription regulator, MarR family                                                       |
| TK0225 | Predicted transcription regulator, ArsR family                                                       |
| TK0448 | Predicted transcription regulator, containing DNA-binding HTH domain                                 |
| TK0457 | Transcription regulator, SpoVT/AbrB family                                                           |
| TK0471 | Probable transcription regulator, DUF118 helix-turn-helix family                                     |
| TK0508 | Predicted transcription regulator, Lrp/AsnC family                                                   |
| TK0539 | Predicted transcription regulator, containing DNA-binding HTH domain                                 |
| TK0559 | Transcription regulator, ArsR family                                                                 |
| TK0567 | Transcription regulator, Lrp/AsnC family                                                             |
| TK0697 | Predicted transcription regulator, containing DNA-binding HTH domain                                 |
| TK0770 | Transcription regulator, PadR-like family                                                            |
| TK0834 | Transcription regulator, Lrp/AsnC family                                                             |
| TK0888 | Transcription regulator, SpoVT/AbrB family                                                           |
| TK0997 | Transcription regulator, SpoVT/AbrB family                                                           |
| TK1041 | Transcription regulator, ArsR family                                                                 |
| TK1057 | Iron(II) uptake regulation protein, frame shift                                                      |
| TK1058 | Iron(II) uptake regulation protein, frame shift                                                      |
| TK1076 | Transcription regulator, SpoVT/AbrB family                                                           |
| TK1086 | Predicted transcription regulator, ArsR family                                                       |
| TK1143 | Transcription regulator, PadR-like family                                                            |
| TK1210 | Transcription regulator, Lrp/AsnC family                                                             |
| TK1259 | Predicted transcription regulator, Lrp/AsnC family                                                   |
| TK1261 | Transcription regulator, ArsR family                                                                 |
| TK1266 | Predicted transcription regulator, containing CBS domains                                            |
| TK1272 | Predicted transcription regulator, containing Crp and DUF120 domains                                 |
| TK1285 | Transcription regulator, Lrp/AsnC family                                                             |
| TK1291 | Predicted transcription regulator, SpoVT/AbrB family                                                 |
| TK1331 | Predicted transcription regulator, Lrp/AsnC family                                                   |
| TK1339 | Predicted transcription regulator, containing DNA-binding HTH domain                                 |
| TK1439 | Probable nickel responsive regulator                                                                 |
| TK1487 | Predicted transcription regulator, Lrp/AsnC family                                                   |
| TK1491 | Transcription regulator, Lrp/AsnC family                                                             |
| TK1494 | Transcription regulator, PadR-like family                                                            |
| TK1591 | Predicted transcription regulator, encoded next to RecA superfamily ATPase                           |
| TK1654 | Transcription regulator, PadR-like family                                                            |
| TK1688 | Predicted transcription regulator, containing DNA-binding HTH domain                                 |
| TK1769 | Predicted transcription regulator, DUF118 helix-turn-helix family                                    |
| TK1815 | Transcription regulator, CopG/RepA family                                                            |
| TK1826 | Predicted transcription regulator, ArsR family                                                       |
| TK1881 | Transcription regulator, ArsR family                                                                 |
| TK1883 | Transcription regulator, ArsR family                                                                 |
| TK1913 | Transcription regulator, ArsR family                                                                 |
| TK1924 | Transcription regulator, PadR-like family                                                            |
| TK1955 | Predicted transcription regulator, Lrp/AsnC family                                                   |
| TK1962 | Predicted transcription regulator, YpuH-like family                                                  |
| TK2052 | Predicted transcription regulator, Lrp/AsnC family                                                   |
| TK2107 | Transcription regulator, PadR-like family                                                            |
| TK2110 | Transcription regulator, Lrp/AsnC family                                                             |
| TK2134 | Transcription regulator, Lrp/AsnC family                                                             |
| TK2151 | Archaeal transcription regulator                                                                     |
| TK2190 | Predicted transcription regulator, ArsR family                                                       |
| TK2197 | Predicted transcription regulator, fused to C-terminal uncharacterized domain                        |
| TK2229 | Transcription regulator, SpoVT/AbrB family                                                           |

TK2245 Transcription regulator, SpoVT/AbrB family, containing PhoU domain  
 TK2259 Predicted transcription regulator, penicillinase repressor family  
 TK2261 Transcription regulator, SpoVT/AbrB family  
 TK2263 Predicted transcription regulator, ExsB family  
 TK2273 Predicted transcription regulator, CopG/RepA family  
 TK2291 Archaeal heat shock regulator, ArsR family

#### *Others*

TK0329 Lysine/arginine/ornithine transport system kinase  
 TK0626 Predicted regulator of amino acid metabolism, containing ACT domain  
 TK0685 NAD-dependent protein deacetylase Sir2p homolog  
 TK0868 Probable bis(5'-adenosyl)-triphosphatase, HIT family  
 TK1031 Predicted ATPase, RNase L inhibitor homolog  
 TK1227 Predicted regulator of amino acid metabolism, containing ACT domain  
 TK1435 Nitrogen regulatory protein P-II  
 TK1456 Probable phosphate transport system regulator, fused to TrkA-C domain  
 TK1457 Probable phosphate transport system regulator, fused to TrkA-C domain  
 TK1572 NGG1p interacting factor 3 homolog  
 TK1639 Probable bis(5'-adenosyl)-triphosphatase, HIT family  
 TK1869 Probable phosphate transport system regulator  
 TK1870 Phosphate transport system regulator  
 TK1967 Distant homolog of phosphate transport system regulator PhoU  
 TK2060 Distant homolog of phosphate transport system regulator PhoU  
 TK2149 Putative effector of murein hydrolase  
 TK2150 Putative effector of murein hydrolase  
 TK2252 Proteasome-activating nucleotidase (proteasome regulatory subunit)

#### **Cell envelope**

##### *Lipid metabolism*

TK0059 CDP-alcohol phosphatidyltransferase  
 TK0180 Acetyl-CoA acetyltransferase  
 TK0181 3-Hydroxy-3-methylglutaryl-CoA synthase  
 TK0789 Glycerol-1-phosphate dehydrogenase  
 TK0914 3-Hydroxy-3-methylglutaryl-CoA reductase  
 TK1026 Geranylgeranylgeranyl diphosphate synthase  
 TK1088 Geranylgeranyl hydrogenase  
 TK1173 Undecaprenyl pyrophosphate synthase  
 TK1468 Bifunctional short-chain isoprenyl diphosphate synthase  
 TK1470 Isopentenyl-diphosphate delta-isomerase  
 TK1474 Mevalonate kinase  
 TK1836 Geranylgeranyl hydrogenase

##### *Surface polysaccharides and protein glycosilation*

TK0219 Sugar-phosphate nucleotidyltransferase  
 TK0364 Dolichol-phosphate mannosyltransferase  
 TK0762 Glycosyltransferase, family 2  
 TK0806 Putative membrane-bound dolichyl-phosphate-mannose-protein mannosyltransferase  
 TK0809 Glucosamine--fructose-6-phosphate aminotransferase (isomerizing)  
 TK0810 Oligosaccharyl transferase, STT3 subunit  
 TK0891 Glycosyltransferase, family 4  
 TK0892 Polysaccharide deacetylase  
 TK0949 Glycosyltransferase, family 4  
 TK0955 Sugar-phosphate nucleotidyltransferase  
 TK1004 UDP-glucose 4-epimerase  
 TK1108 Phosphohexomutase  
 TK1109 Bifunctional mannose-6-phosphate isomerase/mannose-1-phosphate guanylyl transferase  
 TK1188 Sugar-phosphate nucleotidyltransferase  
 TK1230 UDP-N-acetylglucosamine 2-epimerase  
 TK1231 UDP-N-acetyl-D-mannosaminuronate dehydrogenase  
 TK1293 Putative membrane-bound dolichyl-phosphate-mannose-protein mannosyltransferase  
 TK1323 Glycosyltransferase, family 4  
 TK1402 Polysaccharide deacetylase  
 TK1554 Glycosyltransferase, family 2  
 TK1708 UDP-glucose 4-epimerase  
 TK1711 Sugar-phosphate nucleotidyltransferase  
 TK1712 Capsular polysaccharide biosynthesis protein  
 TK1713 Glycosyltransferase, family 4  
 TK1714 Glycosyltransferase, family 2  
 TK1715 CDP-glycerol:poly(glycerophosphate) glycerophosphotransferase  
 TK1716 Cytidyltransferase  
 TK1717 Glycosyltransferase, family 2  
 TK1718 Oligosaccharyl transferase, STT3 subunit  
 TK1719 Capsular polysaccharide biosynthesis protein  
 TK1720 Dolichol-phosphate mannosyltransferase  
 TK1721 Glycosyltransferase, family 4  
 TK1722 Probable beta-1,3-galactosyltransferase  
 TK1723 Glycosyltransferase, family 4  
 TK1731 Glycosyltransferase, family 4  
 TK1732 Dolichol-phosphate mannosyltransferase, fused to C-terminal uncharacterized domain  
 TK1733 Glycosyltransferase, family 1  
 TK1810 Cytidyltransferase  
 TK1819 Capsular polysaccharide biosynthesis protein  
 TK1828 Galactose-1-phosphate uridylyltransferase  
 TK1831 Galactokinase  
 TK1909 Dolichol-phosphate mannosyltransferase, fused to membrane-bound GtrA-like domain  
 TK2185 Phosphohexomutase

|        |                                                                                        |
|--------|----------------------------------------------------------------------------------------|
| TK2254 | UDP-N-acetylglucosamine--dolichyl-phosphate N-acetylglucosaminephosphotransferase      |
| TK2255 | Bifunctional phosphatase/dolichol-phosphate glucosyltransferase                        |
| TK2274 | Glycerol-3-phosphate cytidyltransferase                                                |
| TK2279 | Bifunctional sugar nucleotidyltransferase/CDP-alcohol phosphatidyltransferase synthase |

*Surface structure*

|        |                            |
|--------|----------------------------|
| TK0164 | S-layer-like array protein |
| TK0895 | S-layer protein precursor  |
| TK1589 | S-layer-like array protein |

**Central intermediary metabolism**

*Extracellular protein degradation*

|        |                                           |
|--------|-------------------------------------------|
| TK1295 | Predicted thiol protease                  |
| TK1675 | Subtilisin-like serine protease precursor |
| TK1689 | Subtilisin-like serine protease precursor |
| TK1782 | Serine protease inhibitor Serpin homolog  |
| TK2168 | Archaeal serine protease                  |

*Polysaccharide degradation*

|        |                                              |
|--------|----------------------------------------------|
| TK0522 | Carbohydrate esterase, family 1              |
| TK0977 | Pullulanase type II, GH13 family             |
| TK1406 | Maltodextrin phosphorylase                   |
| TK1434 | alpha-Glucosidase                            |
| TK1436 | Probable alpha-amylase, GH57 family          |
| TK1754 | exo-beta-D-glucosaminidase                   |
| TK1755 | Archaeal glucosamine-6-phosphate deaminase   |
| TK1761 | beta-Glycosidase, GH1 family                 |
| TK1764 | N-Acetylchitobiose deacetylase               |
| TK1765 | Chitinase, containing dual catalytic domains |
| TK1770 | Cyclomaltodextrinase                         |
| TK1774 | Amylopullulanase, GH57 family                |
| TK1809 | 4-alpha-Glucanotransferase, GH57 family      |
| TK1827 | Membrane-bound beta-glycosidase, GH1 family  |
| TK1830 | Probable alpha-amylase, GH57 family          |
| TK1884 | alpha-Amylase precursor, GH13 family         |
| TK2172 | Cyclodextrin glucanotransferase, GH13 family |

*Polysaccharide (cytoplasmic)*

|        |                   |
|--------|-------------------|
| TK1768 | Glycogen synthase |
|--------|-------------------|

*Polyamine*

|        |                                                                    |
|--------|--------------------------------------------------------------------|
| TK0134 | Probable acetylpolyamine aminohydrolase, histon deacetylase family |
| TK0147 | Spermidine synthase                                                |
| TK0149 | Pyruvoyl-dependent arginine decarboxylase                          |
| TK0882 | Agmatinase                                                         |
| TK1592 | S-Adenosylmethionine decarboxylase proenzyme                       |

*Compatible solute*

|        |                                                                 |
|--------|-----------------------------------------------------------------|
| TK0787 | Archaeal inositol-1-monophosphatase/fructose-1,6-bisphosphatase |
| TK1038 | 2-Phosphoglycerate kinase                                       |
| TK1039 | Cyclic 2,3-diphosphoglycerate synthetase                        |
| TK2278 | myo-Inositol-1-phosphate synthase                               |

*Others*

|        |                                                                                                      |
|--------|------------------------------------------------------------------------------------------------------|
| TK0026 | Probable phosphoglycolate phosphatase, HAD superfamily                                               |
| TK0999 | Lysophospholipase, alpha/beta hydrolase superfamily                                                  |
| TK1315 | 3'-Phosphoadenosine 5'-phosphosulfate reductase, fused to RNA-binding PUA and 4Fe-4S binding domains |
| TK1393 | Anaerobic glycerol 3-phosphate dehydrogenase                                                         |
| TK1396 | Glycerol kinase                                                                                      |
| TK1397 | Glycerophosphoryl diester phosphodiesterase                                                          |
| TK1398 | Glycerophosphoryl diester phosphodiesterase                                                          |
| TK1872 | 2-Hydroxyhepta-2,4-diene-1,7-dioate isomerase, FAA hydrolase family                                  |
| TK2132 | Fucose-1-phosphate aldolase                                                                          |
| TK2167 | 3'-Phosphoadenosine 5'-phosphosulfate reductase, fused to N-terminal uncharacterized archaeal domain |

**Amino acid metabolism**

*Aromatic amino acid family*

|        |                                                  |
|--------|--------------------------------------------------|
| TK0252 | Indole-3-glycerol phosphate synthase             |
| TK0253 | Anthranilate phosphoribosyltransferase           |
| TK0254 | Anthranilate synthase, component I               |
| TK0255 | Anthranilate synthase, component II              |
| TK0256 | N-(5'-Phosphoribosyl)anthranilate isomerase      |
| TK0257 | Tryptophan synthase, beta subunit                |
| TK0258 | Tryptophan synthase, alpha subunit               |
| TK0259 | Prephenate dehydrogenase                         |
| TK0260 | Probable aromatic aminotransferase               |
| TK0261 | Predicted chorismate mutase, N-truncation        |
| TK0262 | Chorismate synthase                              |
| TK0263 | 5-Enolpyruvylshikimate-3-phosphate synthase      |
| TK0264 | Archaeal shikimate kinase                        |
| TK0265 | Shikimate 5-dehydrogenase                        |
| TK0266 | 3-Dehydroquinate dehydratase                     |
| TK0267 | 3-Dehydroquinate synthetase                      |
| TK0268 | 2-Dehydro-3-deoxyphosphoheptonate aldolase       |
| TK1442 | Tryptophan synthase beta subunit-related protein |

*Aspartate family*

|        |                                             |
|--------|---------------------------------------------|
| TK0028 | S-Adenosyl-L-homocysteine hydrolase         |
| TK0504 | Aspartate racemase                          |
| TK0545 | S-Adenosylmethionine synthetase             |
| TK0916 | Threonine 3-dehydrogenase                   |
| TK0950 | Asparagine synthase (glutamine-hydrolyzing) |



TK1443 Aspartate-semialdehyde dehydrogenase  
 TK1444 Homoserine kinase  
 TK1445 Aspartokinase  
 TK1446 Methionine synthase II (cobalamin-independent)  
 TK1447 Methionine synthase II (cobalamin-independent)  
 TK1448 5,10-Methylenetetrahydrofolate reductase  
 TK1449 Cystathionine gamma-synthase  
 TK1471 Aspartate racemase  
 TK1478 Threonine synthase  
 TK1627 Homoserine dehydrogenase  
 TK1656 L-Asparaginase  
 TK2205 Threonine synthase  
 TK2246 L-Asparaginase

*Glutamate family*

TK0119 Proline dehydrogenase, alpha subunit (dye-linked NADH dehydrogenase)  
 TK0120 Proline dehydrogenase, gamma subunit (4Fe-4S cluster-binding component)  
 TK0121 Proline dehydrogenase, delta subunit (2Fe-2S cluster-binding component)  
 TK0122 Proline dehydrogenase, beta subunit (dye-linked proline dehydrogenase component)  
 TK0240 Arginase  
 TK0272 Pyrroline-5-carboxylate reductase, flame shift  
 TK0273 Pyrroline-5-carboxylate reductase, flame shift  
 TK0474 Arginase  
 TK0871 Ornithine carbamoyltransferase  
 TK1431 Glutamate dehydrogenase  
 TK1796 Glutamine synthetase  
 TK1814 Glutamate decarboxylase

*Histidine family*

TK0242 ATP phosphoribosyltransferase, predicted regulatory subunit  
 TK0243 ATP phosphoribosyltransferase  
 TK0244 Histidinol dehydrogenase  
 TK0245 Imidazoleglycerol-phosphate dehydratase  
 TK0246 Imidazoleglycerol-phosphate synthase, subunit H  
 TK0247 1-(5-Phosphoribosyl)-5-[(5-phosphoribosylamino)methylideneamino] imidazole-4-carboxamide isomerase  
 TK0248 Imidazoleglycerol-phosphate synthase, cyclase subunit F  
 TK0249 Bifunctional phosphoribosyl-AMP cyclohydrolase/phosphoribosyl-ATP pyrophosphohydrolase  
 TK0250 Histidinol-phosphate aminotransferase

*Lysine family*

TK0274 N2-Acetyl-lysine deacetylase  
 TK0275 N2-Acetyl-lysine aminotransferase  
 TK0276 N2-Acetyl-aminoadipate kinase  
 TK0277 N2-Acetyl-aminoadipyl-delta-phosphate reductase  
 TK0278 RimK-related lysine biosynthesis protein  
 TK0279 Probable lysine biosynthesis protein  
 TK0280 Homoisocitrate dehydrogenase  
 TK0281 Homoaconitase, small subunit  
 TK0282 Homoaconitase, large subunit  
 TK0283 Homocitrate synthase  
 TK0875 Saccharopine reductase  
 TK1237 Probable dihydrodipicolinate synthase

*Serine family*

TK0052 Phosphoserine phosphatase  
 TK0116 Sarcosine oxidase, alpha subunit  
 TK0117 Sarcosine oxidase, beta subunit  
 TK0150 Glycine cleavage system protein H  
 TK0528 Serine hydroxymethyltransferase  
 TK1379 Glycine cleavage system protein P (pyridoxal-binding), subunit 2  
 TK1380 Glycine cleavage system protein P (pyridoxal-binding), subunit 1  
 TK1548 Probable serine--glyoxylate aminotransferase, class V  
 TK1687 Cysteine synthase  
 TK1966 D-3-Phosphoglycerate dehydrogenase  
 TK2035 Glycine cleavage system protein T (aminomethyltransferase)  
 TK2217 2-Amino-3-oxobutyrate coenzyme A ligase (glycine C-acetyltransferase)

**Nucleotide metabolism**

*Purines*

TK0190 GMP synthase, glutamine amidotransferase component  
 TK0193 GMP synthase, PP-loop-ATPase component  
 TK0194 Inosine-5'-monophosphate dehydrogenase  
 TK0197 Phosphoribosylformylglycinamide synthase II  
 TK0201 Phosphoribosylformylglycinamide synthase I  
 TK0202 Phosphoribosylformylglycinamide synthase, PurS component  
 TK0204 Phosphoribosylamine-glycine ligase  
 TK0207 Formate-dependent phosphoribosylglycinamide formyltransferase  
 TK0208 Phosphoribosylformylglycinamide cyclo-ligase  
 TK0210 Phosphoribosylaminoimidazole-succinocarboxamide synthase  
 TK0211 Amidophosphoribosyltransferase  
 TK0430 Inosine 5'-monophosphate cyclohydrolase  
 TK0432 Phosphoribosylaminoimidazolesuccinocarboxamide synthase  
 TK0561 Adenylosuccinate lyase  
 TK0835 Phosphoribosylaminoimidazole carboxylase, ATPase subunit  
 TK0836 Phosphoribosylaminoimidazole carboxylase, catalytic subunit  
 TK1002 Adenylosuccinate synthase

*Pyrimidines*

TK0870 Alternative thymidylate synthase

TK1193 CTP synthase (UTP--ammonia ligase)  
 TK1805 Dihydroorotase  
 TK1806 Probable dihydroorotate dehydrogenase, electron transfer subunit  
 TK2138 Orotate phosphoribosyltransferase  
 TK2195 Aspartate carbamoyltransferase, regulatory subunit  
 TK2196 Aspartate carbamoyltransferase, catalytic subunit  
 TK2260 Dihydroorotate dehydrogenase  
 TK2276 Orotidine-5'-phosphate decarboxylase

#### *2-Deoxyribonucleotide metabolism*

TK1736 Ribonucleoside-diphosphate reductase; two inteins  
 TK2298 Anaerobic ribonucleoside-triphosphate reductase  
 TK2299 Anaerobic ribonucleoside-triphosphate reductase activating enzyme

#### *Nucleotide and nucleoside interconversions*

TK0305 Uridylate kinase  
 TK0338 Predicted nucleotide kinase, related to CMP and AMP kinases  
 TK0700 Nucleotide pyrophosphohydrolase  
 TK0812 Adenylate kinase  
 TK1260 Nucleotide pyrophosphohydrolase  
 TK1307 Nucleoside diphosphate kinase  
 TK1403 Thymidylate kinase  
 TK1414 Deoxycytidine triphosphate deaminase  
 TK1514 Cytidylate kinase  
 TK1517 Archaeal adenylate kinase  
 TK1640 Nucleotide pyrophosphohydrolase  
 TK1891 Probable guanine deaminase  
 TK2257 Deoxycytidylate deaminase

#### *Purine and pyrimidine salvage*

TK0352 Thymidine phosphorylase  
 TK0664 Hypoxanthine/guanine phosphoribosyltransferase  
 TK1287 Uracil phosphoribosyltransferase  
 TK1318 Thymidine kinase  
 TK1479 Uridine phosphorylase  
 TK1482 Purine-nucleoside phosphorylase  
 TK1489 Adenine phosphoribosyltransferase, fused to N-terminal DNA-binding domain  
 TK1737 Xanthine/guanine phosphoribosyltransferase  
 TK1895 Purine-nucleoside phosphorylase

### **Cofactor and prosthetic group metabolism**

#### *Molybdopterin*

TK0354 Molybdenum cofactor biosynthesis protein C  
 TK0541 Molybdenum cofactor biosynthesis protein MoeA  
 TK0544 Molybdenum cofactor biosynthesis protein B  
 TK0749 Probable molybdopterin-guanine dinucleotide biosynthesis protein A  
 TK0934 Molybdopterin-guanine dinucleotide biosynthesis protein B  
 TK1064 Predicted metallocofactor modifying protein, radical SAM superfamily  
 TK1065 Molybdopterin converting factor, subunit 1  
 TK1228 Probable molybdenum cofactor biosynthesis protein A  
 TK1282 Molybdenum cofactor biosynthesis protein MoeA  
 TK2002 Molybdopterin-guanine dinucleotide biosynthesis protein A  
 TK2115 Molybdopterin converting factor, subunit 2  
 TK2117 Molybdenum cofactor biosynthesis protein MoeB  
 TK2118 Molybdopterin converting factor, subunit 1  
 TK2225 Molybdenum cofactor biosynthesis protein A

#### *Pantothenate and CoA*

TK0153 ATP:dephospho-CoA triphosphoribosyl transferase  
 TK0363 3-Methyl-2-oxobutanoate hydroxymethyltransferase  
 TK0517 Phosphopantothenoylcysteine synthetase/decarboxylase  
 TK1334 Dephospho-CoA kinase  
 TK1968 2-Dehydropantoate 2-reductase  
 TK2128 Phosphopantetheine adenyllyltransferase  
 TK2192 Dephospho-CoA kinase

#### *Pyridine nucleotide*

TK0067 Nicotinamide mononucleotide adenyllyltransferase  
 TK0218 Nicotinate-nucleotide pyrophosphorylase  
 TK0296 Quinolate synthetase A  
 TK0297 L-Aspartate oxidase (quinolate synthetase B)  
 TK1301 Probable ATP-NAD kinase  
 TK1650 Probable nicotinamidase  
 TK1676 Nicotinate-nucleotide pyrophosphorylase  
 TK1798 NH<sub>3</sub>-dependent NAD<sup>+</sup> synthetase  
 TK2124 ATP-NAD kinase

#### *Pyridoxine*

TK0216 Pyridoxine biosynthesis amidotransferase, SNO family  
 TK0217 Pyridoxine/pyridoxal 5-phosphate biosynthesis protein, SOR/SNZ family

#### *Riboflavin*

TK0424 Riboflavin biosynthesis protein RibD  
 (Diaminohydroxyphosphoribosylaminopyrimidine deaminase and 5-amino-6-(5-phosphoribosylamino)uracil reductase)  
 TK0425 Riboflavin synthase, alpha subunit  
 TK0428 Riboflavin biosynthesis protein RibA (GTP cyclohydrolase II and 3,4-dihydroxy-2-butanone 4-phosphate synthase)  
 TK0429 Riboflavin synthase, beta subunit

#### *Thiamine*

TK0366 Thil-related protein  
 TK0368 Thiamine biosynthesis protein Thil  
 TK0433 Thiamine biosynthesis protein ThiC

TK0434 Thiazole biosynthetic enzyme Thi4  
 TK0435 Phosphomethylpyrimidine kinase, fused to C-terminal uncharacterized domain  
 TK0890 Thiamine monophosphate kinase  
 TK1093 Sulfur transfer protein involved in thiamine biosynthesis

#### *Cobalamine salvage*

TK0846 Adenosylcobinamide amidohydrolase  
 TK0853 NaMN:DMB phosphoribosyltransferase  
 TK0854 Cobyric acid synthase  
 TK0856 GTP:adenosylcobinamide-phosphate guanylyltransferase  
 TK0857 Cobalamin-5-phosphate synthase  
 TK0863 Cobinamide synthase  
 TK0864 Threonine-O-3-phosphate decarboxylase  
 TK1045 Cobalamin adenosyltransferase  
 TK2130 ATP:corrinoid adenosyltransferase

#### *Others*

TK0509 3-Octaprenyl-4-hydroxybenzoate decarboxylase UbiX  
 TK0730 ABC-type transport system involved in Fe-S cluster assembly, permease component  
 TK0731 ABC-type transport system involved in Fe-S cluster assembly, ATPase component  
 TK0747 Bifunctional biotin-protein ligase/biotin operon repressor  
 TK0748 Biotin biosynthesis protein BioY  
 TK0929 3-Octaprenyl-4-hydroxybenzoate decarboxylase UbiD  
 TK0987 Biotin-protein ligase  
 TK1119 6-Pyruvoyl-tetrahydropterin synthase  
 TK1161 Dihydropteroate synthase  
 TK1234 Lipoate-protein ligase A, C-terminal section  
 TK1324 4-Hydroxybenzoate octaprenyltransferase  
 TK1908 Lipoate-protein ligase A, N-terminal section  
 TK1957 4-Hydroxybenzoate octaprenyltransferase  
 TK1990 Cysteine desulfurase

### **Energy metabolism**

#### *Amino acid degradation*

TK0135 Indolepyruvate: ferredoxin oxidoreductase, beta subunit  
 TK0136 Indolepyruvate: ferredoxin oxidoreductase, alpha subunit  
 TK0139 Acetyl-CoA synthetase II (NDP forming), alpha subunit  
 TK0186 Multiple substrate aminotransferase  
 TK0465 Acetyl-CoA synthetase I (NDP forming), beta subunit  
 TK0548 Aromatic aminotransferase  
 TK0665 Acetyl-CoA synthetase I (NDP forming), alpha subunit  
 TK0816 2-Oxoacid:ferredoxin oxidoreductase, beta subunit  
 TK0817 2-Oxoacid:ferredoxin oxidoreductase, alpha subunit  
 TK0943 Acetyl-CoA synthetase II (NDP forming), beta subunit  
 TK0944 Acyl-CoA synthetase (NDP forming), large subunit  
 TK1066 Tungsten-containing aldehyde:ferredoxin oxidoreductase  
 TK1094 Alanine aminotransferase  
 TK1123 2-Oxoacid:ferredoxin oxidoreductases, gamma subunit  
 TK1124 2-Oxoacid:ferredoxin oxidoreductases, beta subunit  
 TK1125 2-Oxoacid:ferredoxin oxidoreductases, alpha subunit  
 TK1126 2-Oxoacid:ferredoxin oxidoreductases, gamma subunit  
 TK1129 2-Oxoacid:ferredoxin oxidoreductases, beta subunit  
 TK1130 2-Oxoacid:ferredoxin oxidoreductases, alpha subunit  
 TK1131 2-Oxoacid:ferredoxin oxidoreductase, delta subunit  
 TK1211 Aminotransferase, class III  
 TK1643 Indolepyruvate: ferredoxin oxidoreductase, alpha subunit  
 TK1880 Archaeal succinyl-CoA synthetase (NDP forming), large subunit  
 TK1978 Pyruvate/2-oxoisovalerate: ferredoxin oxidoreductases, common gamma subunit  
 TK1979 2-Oxoisovalerate:ferredoxin oxidoreductase, delta subunit  
 TK1980 2-Oxoisovalerate:ferredoxin oxidoreductase, alpha subunit  
 TK1981 2-Oxoisovalerate:ferredoxin oxidoreductase, beta subunit  
 TK1982 Pyruvate:ferredoxin oxidoreductase, delta subunit  
 TK1983 Pyruvate:ferredoxin oxidoreductase, alpha subunit  
 TK1984 Pyruvate:ferredoxin oxidoreductase, beta subunit  
 TK2101 Aminotransferase, class III  
 TK2127 Acyl-CoA synthetase (NDP forming), large subunit  
 TK2244 Indolepyruvate: ferredoxin oxidoreductase, beta subunit  
 TK2268 Aspartate aminotransferase

#### *Glycolysis/gluconeogenesis*

TK0376 ADP-dependent phosphofructokinase  
 TK0511 Pyruvate kinase  
 TK0705 NADP-dependent glyceraldehyde-3-phosphate dehydrogenase (non-phosphorylating)  
 TK0765 Glyceraldehyde-3-phosphate dehydrogenase (phosphorylating)  
 TK0866 2,3-Bisphosphoglycerate-independent phosphoglycerate mutase  
 TK0989 DhnA-type fructose-1,6-bisphosphate aldolase  
 TK1110 ADP-dependent glucokinase  
 TK1111 Archaeal glucose-6-phosphate isomerase  
 TK1146 3-Phosphoglycerate kinase  
 TK1292 Phosphoenolpyruvate synthetase (pyruvate, water dikinase)  
 TK2106 Enolase  
 TK2129 Triosephosphate isomerase  
 TK2163 Tungsten-containing glyceraldehyde-3-phosphate:ferredoxin oxidoreductase  
 TK2164 Thermophile-specific fructose-1,6-bisphosphatase

#### *Pentose metabolism*

TK0269 Transketolase, C-terminal section  
 TK0270 Transketolase, N-terminal section

|                                                |                                                                                             |
|------------------------------------------------|---------------------------------------------------------------------------------------------|
| TK0475                                         | D-Arabinose 3-hexulose-6-phosphate formaldehyde lyase, fused to phosphohexuloisomerase      |
| TK1426                                         | Ribose 5-phosphate isomerase                                                                |
| TK1777                                         | Phosphopentomutase                                                                          |
| TK2104                                         | Deoxyribose-phosphate aldolase                                                              |
| TK2235                                         | Phosphoribosylpyrophosphate synthetase                                                      |
| TK2290                                         | Ribulose 1,5-bisphosphate carboxylase/oxygenase, TypeIII                                    |
| <i>Pyruvate/oxaloacetate metabolism</i>        |                                                                                             |
| TK0289                                         | Pyruvate-formate lyase                                                                      |
| TK0375                                         | Probable maleate cis-trans isomerase                                                        |
| TK0990                                         | Oxaloacetate decarboxylase, alpha subunit                                                   |
| TK1405                                         | Phosphoenolpyruvate carboxykinase (GTP)                                                     |
| TK1963                                         | NADP-dependent malic enzyme                                                                 |
| TK1964                                         | Probable fumarate hydratase, beta subunit                                                   |
| TK1965                                         | Probable fumarate hydratase, alpha subunit                                                  |
| <i>Propanoate metabolism</i>                   |                                                                                             |
| TK0328                                         | Methylmalonyl-CoA mutase, C-terminus of large subunit (cobalamin-binding)                   |
| TK0330                                         | Methylmalonyl-CoA epimerase                                                                 |
| TK1149                                         | Methylmalonyl-CoA mutase, N-terminus of large subunit                                       |
| TK1622                                         | Methylmalonyl-CoA decarboxylase, alpha subunit                                              |
| TK1623                                         | Methylmalonyl-CoA decarboxylase, delta subunit                                              |
| TK1624                                         | Methylmalonyl-CoA decarboxylase, gamma subunit                                              |
| TK1625                                         | Methylmalonyl-CoA decarboxylase, beta subunit                                               |
| <i>ATP-proton motive force interconversion</i> |                                                                                             |
| TK1596                                         | Archaeal/vacuolar-type H <sup>+</sup> -ATPase, subunit H                                    |
| TK1597                                         | Archaeal/vacuolar-type H <sup>+</sup> -ATPase, subunit I                                    |
| TK1598                                         | Archaeal/vacuolar-type H <sup>+</sup> -ATPase, subunit K                                    |
| TK1599                                         | Archaeal/vacuolar-type H <sup>+</sup> -ATPase, subunit E                                    |
| TK1600                                         | Archaeal/vacuolar-type H <sup>+</sup> -ATPase, subunit C                                    |
| TK1601                                         | Archaeal/vacuolar-type H <sup>+</sup> -ATPase, subunit F                                    |
| TK1602                                         | Archaeal/vacuolar-type H <sup>+</sup> -ATPase, subunit A                                    |
| TK1603                                         | Archaeal/vacuolar-type H <sup>+</sup> -ATPase, subunit B                                    |
| TK1604                                         | Archaeal/vacuolar-type H <sup>+</sup> -ATPase, subunit D                                    |
| <i>Electron transport</i>                      |                                                                                             |
| TK0072                                         | Tungsten-containing oxidoreductase                                                          |
| TK0214                                         | Probable formate dehydrogenase, alpha subunit                                               |
| TK0284                                         | NAD(P)H-flavin oxidoreductase                                                               |
| TK0316                                         | Rubrerithrin-related protein, fused to C-terminal DUF835 domain                             |
| TK0370                                         | NAD(P)H-flavin oxidoreductase                                                               |
| TK0551                                         | D-Isomer specific 2-hydroxyacid dehydrogenase                                               |
| TK0650                                         | Rubrerithrin-related protein                                                                |
| TK0651                                         | NAD(P)-dependent dyhydrogenase, Gfo/Idh/MocA family                                         |
| TK0672                                         | Glutamate synthase beta chain-related oxidoreductase                                        |
| TK0673                                         | Short-chain alcohol dehydrogenase                                                           |
| TK0683                                         | Glyoxylate reductase                                                                        |
| TK0690                                         | Molybdopterin oxidoreductase, molybdopterin-binding subunit                                 |
| TK0723                                         | Iron-molybdenum cofactor-binding protein                                                    |
| TK0724                                         | Iron-molybdenum cofactor-binding protein                                                    |
| TK0732                                         | Iron-molybdenum cofactor-binding protein                                                    |
| TK0736                                         | Short-chain alcohol dehydrogenase                                                           |
| TK0740                                         | 4Fe-4S cluster-binding protein                                                              |
| TK0814                                         | Type A flavoprotein                                                                         |
| TK0839                                         | NAD(P)H-flavin oxidoreductase                                                               |
| TK0840                                         | NAD(P)H-flavin oxidoreductase                                                               |
| TK0844                                         | Tungsten-containing oxidoreductase                                                          |
| TK0845                                         | Oxidoreductase, aldo/keto reductase family                                                  |
| TK1008                                         | Fe-containing alcohol dehydrogenase                                                         |
| TK1056                                         | Rubrerithrin-related protein                                                                |
| TK1062                                         | Rubrerithrin-related protein                                                                |
| TK1087                                         | Ferredoxin 2                                                                                |
| TK1208                                         | Glutaredoxin-related protein                                                                |
| TK1209                                         | Transmembrane electron transport protein                                                    |
| TK1214                                         | Membrane bound hydrogenase, 4Fe-4S cluster-binding subunit                                  |
| TK1215                                         | Membrane bound hydrogenase, NiFe-hydrogenase large subunit 2                                |
| TK1216                                         | Membrane bound hydrogenase, NiFe-hydrogenase large subunit 1                                |
| TK1217                                         | Membrane bound hydrogenase, NiFe-hydrogenase small subunit                                  |
| TK1218                                         | Membrane bound hydrogenase, MbxM subunit                                                    |
| TK1219                                         | Membrane bound hydrogenase, MbxH' subunit                                                   |
| TK1220                                         | Membrane bound hydrogenase, MbxH subunit                                                    |
| TK1221                                         | Membrane bound hydrogenase, MbxG subunit                                                    |
| TK1222                                         | Membrane bound hydrogenase, MbxF subunit                                                    |
| TK1223                                         | Membrane bound hydrogenase, MbxD subunit                                                    |
| TK1224                                         | Membrane bound hydrogenase, MbxC subunit                                                    |
| TK1225                                         | Membrane bound hydrogenase, MbxB subunit                                                    |
| TK1226                                         | Membrane bound hydrogenase, MbxA subunit                                                    |
| TK1325                                         | Ferredoxin:NADP oxidoreductase, alpha subunit                                               |
| TK1326                                         | Ferredoxin:NADP oxidoreductase, beta subunit                                                |
| TK1391                                         | Molybdopterin oxidoreductase, 4Fe-4S cluster-binding subunit                                |
| TK1472                                         | CinA-related molybdopterin-binding protein                                                  |
| TK1481                                         | NADH:polysulfide oxidoreductase                                                             |
| TK1512                                         | Short-chain alcohol dehydrogenase                                                           |
| TK1557                                         | Predicted dehydrogenase                                                                     |
| TK1569                                         | Iron-containing alcohol dehydrogenase                                                       |
| TK1612                                         | Glutamate synthase beta chain-related oxidoreductase, containing 2Fe-2S and 4Fe-4S clusters |

|        |                                                              |
|--------|--------------------------------------------------------------|
| TK1613 | NADH:ubiquinone oxidoreductase, NADH-binding subunit F       |
| TK1614 | NADH:ubiquinone oxidoreductase, subunit E                    |
| TK1674 | Flavin reductase-related oxidoreductase                      |
| TK1677 | Short-chain alcohol dehydrogenase                            |
| TK1684 | Ferredoxin:NADP oxidoreductase, alpha subunit                |
| TK1685 | Ferredoxin:NADP oxidoreductase, beta subunit                 |
| TK1694 | Ferredoxin 1                                                 |
| TK2010 | Iron-molybdenum cofactor-binding protein, flame shift        |
| TK2011 | Iron-molybdenum cofactor-binding protein, flame shift        |
| TK2012 | Ferredoxin 3                                                 |
| TK2016 | Iron-molybdenum cofactor-binding protein                     |
| TK2069 | Cytosolic NiFe-hydrogenase, alpha subunit                    |
| TK2070 | Cytosolic NiFe-hydrogenase, delta subunit                    |
| TK2071 | Cytosolic NiFe-hydrogenase, gamma subunit                    |
| TK2072 | Cytosolic NiFe-hydrogenase, beta subunit                     |
| TK2073 | 4Fe-4S cluster-binding protein                               |
| TK2074 | Glutamate synthase beta chain-related oxidoreductase         |
| TK2075 | 4Fe-4S cluster-binding protein                               |
| TK2076 | Probable formate dehydrogenase, alpha subunit                |
| TK2077 | 4Fe-4S cluster-binding protein                               |
| TK2078 | 4Fe-4S cluster-binding protein                               |
| TK2080 | Membrane bound hydrogenase, MbhA subunit                     |
| TK2081 | Membrane bound hydrogenase, MbhB subunit                     |
| TK2082 | Membrane bound hydrogenase, MbhC subunit                     |
| TK2083 | Membrane bound hydrogenase, MbhD subunit                     |
| TK2084 | Membrane bound hydrogenase, MbhE subunit                     |
| TK2085 | Membrane bound hydrogenase, MbhF subunit                     |
| TK2086 | Membrane bound hydrogenase, MbhG subunit                     |
| TK2087 | Membrane bound hydrogenase, MbhH subunit                     |
| TK2088 | Membrane bound hydrogenase, MbhI subunit                     |
| TK2089 | Membrane bound hydrogenase, NiFe-hydrogenase small subunit   |
| TK2090 | Membrane bound hydrogenase, NiFe-hydrogenase large subunit 1 |
| TK2091 | Membrane bound hydrogenase, NiFe-hydrogenase large subunit 2 |
| TK2092 | Membrane bound hydrogenase, MbhM subunit                     |
| TK2093 | Membrane bound hydrogenase, 4Fe-4S cluster-binding subunit   |
| TK2094 | Rubryerythrin-related protein                                |
| TK2095 | Rubryerythrin-related protein                                |
| TK2096 | Rubryerythrin-related protein                                |
| TK2159 | Predicted oxidoreductase                                     |

#### *Others*

|        |                           |
|--------|---------------------------|
| TK1700 | Inorganic pyrophosphatase |
| TK2031 | Acylphosphatase           |

#### **Nitrogen metabolism**

|        |                                                      |
|--------|------------------------------------------------------|
| TK0332 | Allophanate hydrolase, subunit 2                     |
| TK0333 | Allophanate hydrolase, subunit 1                     |
| TK2158 | Carbamate kinase-like carbamoyl phosphate synthetase |

#### **Transport and binding proteins**

##### *Anions*

|        |                                                            |
|--------|------------------------------------------------------------|
| TK0018 | ABC-type sulfate transport system, permease component      |
| TK0021 | ABC-type sulfate transport system, ATPase component        |
| TK0761 | Sodium/phosphate symporter                                 |
| TK0886 | Voltage-gated chloride channel protein                     |
| TK1864 | ABC-type phosphate transport system, periplasmic component |
| TK1866 | ABC-type phosphate transport system, permease component    |
| TK1867 | ABC-type phosphate transport system, permease component    |
| TK1868 | ABC-type phosphate transport system, ATPase component      |
| TK1977 | Sodium/phosphate symporter                                 |
| TK2061 | Sodium/phosphate symporter                                 |

##### *Cations*

|        |                                                                                                                   |
|--------|-------------------------------------------------------------------------------------------------------------------|
| TK0015 | ABC-type molybdate transport system, periplasmic component                                                        |
| TK0158 | ABC-type iron(III) transport system, ATPase component                                                             |
| TK0159 | ABC-type iron(III) transport system, permease component                                                           |
| TK0505 | Magnesium and cobalt transporter                                                                                  |
| TK0570 | ABC-type iron(III) transport system, periplasmic component                                                        |
| TK0571 | ABC-type iron(III) transport system, permease component                                                           |
| TK0572 | ABC-type iron(III) transport system, ATPase component                                                             |
| TK0618 | Multisubunit sodium/hydrogen antiporter, MnhE subunit                                                             |
| TK0619 | Multisubunit sodium/hydrogen antiporter, MnhF subunit                                                             |
| TK0620 | Multisubunit sodium/hydrogen antiporter, MnhG subunit                                                             |
| TK0621 | Multisubunit sodium/hydrogen antiporter, predicted subunit                                                        |
| TK0622 | Multisubunit sodium/hydrogen antiporter, predicted subunit                                                        |
| TK0623 | Multisubunit sodium/hydrogen antiporter, MnhB subunit                                                             |
| TK0624 | Multisubunit sodium/hydrogen antiporter, MnhC subunit                                                             |
| TK0625 | Multisubunit sodium/hydrogen antiporter, MnhD subunit                                                             |
| TK0627 | NapA-type sodium/hydrogen antiporter                                                                              |
| TK0652 | Heavy-metal cation transporter, ZIP family                                                                        |
| TK0661 | ABC-type manganese/zinc transport system, periplasmic component (surface adhesin A homolog)                       |
| TK0706 | ABC-type iron(III)-siderophore transport system, periplasmic component fused to N-terminal uncharacterized domain |
| TK0707 | ABC-type iron(III)-siderophore transport system, permease component                                               |
| TK0708 | ABC-type iron(III)-siderophore transport system, ATPase component                                                 |
| TK0714 | Iron(II) transport protein B                                                                                      |
| TK0715 | Iron(II) transport protein A                                                                                      |
| TK0716 | Iron(II) transport protein A                                                                                      |

|                                            |                                                                                    |
|--------------------------------------------|------------------------------------------------------------------------------------|
| TK0717                                     | ABC-type molybdate transport system, periplasmic component                         |
| TK0718                                     | ABC-type molybdate transport system, permease component                            |
| TK0719                                     | ABC-type molybdate transport system, ATPase component                              |
| TK0745                                     | ABC-type cobalt transport system, permease component                               |
| TK0746                                     | ABC-type cobalt transport system, ATPase component                                 |
| TK0803                                     | ABC-type manganese/zinc transport system, ATPase component                         |
| TK0804                                     | ABC-type manganese/zinc transport system, permease component                       |
| TK0837                                     | Heavy-metal transporting P-type ATPase                                             |
| TK0867                                     | Sodium/calcium antiporter                                                          |
| TK0884                                     | NapA-type sodium/hydrogen antiporter                                               |
| TK0957                                     | Iron(II) transport protein B                                                       |
| TK0958                                     | Iron(II) transport protein A                                                       |
| TK1063                                     | Small-conductance mechanosensitive channel                                         |
| TK1103                                     | ABC-type cobalt transport system, CbiM permease component                          |
| TK1105                                     | ABC-type cobalt transport system, CbiQ permease component                          |
| TK1106                                     | ABC-type cobalt transport system, ATPase component                                 |
| TK1181                                     | ABC-type cobalt transport system, ATPase component                                 |
| TK1182                                     | Trk-type potassium transport system, membrane component                            |
| TK1336                                     | ABC-type sodium efflux pump system, permease component                             |
| TK1337                                     | ABC-type sodium efflux pump system, ATPase component                               |
| TK1458                                     | Magnesium transporter                                                              |
| TK1559                                     | NapA-type sodium/hydrogen antiporter                                               |
| TK1560                                     | NapA-type sodium/hydrogen antiporter                                               |
| TK1595                                     | Trk-type potassium transport system, NAD-binding component                         |
| TK1813                                     | NapA-type sodium/hydrogen antiporter                                               |
| TK1817                                     | Cobalt/zinc/cadmium cation efflux pump protein                                     |
| TK1900                                     | Calcium-gated potassium channel protein                                            |
| TK1940                                     | Small-conductance mechanosensitive channel                                         |
| TK2009                                     | Cobalt/zinc/cadmium cation efflux pump protein                                     |
| TK2018                                     | ABC-type iron(III)-siderophore transport system, periplasmic component             |
| TK2019                                     | ABC-type iron(III)-siderophore transport system, permease component                |
| TK2020                                     | ABC-type iron(III)-siderophore transport system, ATPase component                  |
| TK2142                                     | NhaC-type sodium/hydrogen antiporter                                               |
| TK2208                                     | ABC-type iron(III)-siderophore transport system, ATPase component                  |
| TK2209                                     | ABC-type iron(III)-siderophore transport system, permease component                |
| <i>Carbohydrates and organic compounds</i> |                                                                                    |
| TK0157                                     | Xanthine/uracil permease                                                           |
| TK0295                                     | Predicted sodium-dependent transporter                                             |
| TK0757                                     | ABC-type thiamine transport system, periplasmic component                          |
| TK0865                                     | Probable vitamin B12 transport protein precursor                                   |
| TK0935                                     | TRAP-type transporter, periplasmic component                                       |
| TK0937                                     | TRAP-type transporter, fused permease components                                   |
| TK1212                                     | Xanthine/uracil permease                                                           |
| TK1432                                     | Sodium-dependent transporter, SNF family                                           |
| TK1771                                     | ABC-type maltodextrin transport system, maltodextrin-binding periplasmic component |
| TK1772                                     | ABC-type maltodextrin transport system, permease component                         |
| TK1773                                     | ABC-type maltodextrin transport system, permease component                         |
| TK1775                                     | ABC-type maltodextrin transport system, ATPase component                           |
| TK2015                                     | C4-Dicarboxylate transporter                                                       |
| TK2079                                     | Probable formate transporter                                                       |
| <i>Peptides and amino acids</i>            |                                                                                    |
| TK0115                                     | Sodium/proline symporter, SSF family                                               |
| TK0684                                     | Aromatic amino acid permease                                                       |
| TK0986                                     | Proton/glutamate symporter, SDF family                                             |
| TK1568                                     | Sodium/proline symporter, SSF family                                               |
| TK1659                                     | Small neutral amino acid transporter                                               |
| TK1756                                     | ABC-type dipeptide/oligopeptide transport system, ATPase component                 |
| TK1757                                     | ABC-type dipeptide/oligopeptide transport system, ATPase component                 |
| TK1758                                     | ABC-type dipeptide/oligopeptide transport system, permease component               |
| TK1759                                     | ABC-type dipeptide/oligopeptide transport system, permease component               |
| TK1760                                     | ABC-type dipeptide/oligopeptide transport system, periplasmic component            |
| TK1779                                     | Oligopeptide transporter, OPT family                                               |
| TK1800                                     | ABC-type dipeptide/oligopeptide transport system, ATPase component                 |
| TK1801                                     | ABC-type dipeptide/oligopeptide transport system, ATPase component                 |
| TK1802                                     | ABC-type dipeptide/oligopeptide transport system, permease component               |
| TK1803                                     | ABC-type dipeptide/oligopeptide transport system, permease component               |
| TK1804                                     | ABC-type dipeptide/oligopeptide transport system, probable periplasmic component   |
| TK1859                                     | Probable lipoprotein releasing system, ATP-binding protein                         |
| TK1860                                     | ABC-type dipeptide/oligopeptide transport system, permease component               |
| TK1861                                     | ABC-type dipeptide/oligopeptide transport system, permease component               |
| TK2057                                     | ABC-type dipeptide/oligopeptide transport system, permease component               |
| TK2058                                     | ABC-type dipeptide/oligopeptide transport system, permease component               |
| <i>General</i>                             |                                                                                    |
| TK0019                                     | Predicted ABC-type transport system, ATPase component                              |
| TK0123                                     | Multidrug-efflux transporter                                                       |
| TK0161                                     | ABC-type multidrug transport system, ATPase component                              |
| TK0198                                     | Predicted permease, major facilitator superfamily, flame shift                     |
| TK0199                                     | Predicted permease, major facilitator superfamily, flame shift                     |
| TK0223                                     | Predicted permease, major facilitator superfamily                                  |
| TK0230                                     | ABC-type multidrug transport system, ATPase component                              |
| TK0231                                     | ABC-type multidrug transport system, permease component                            |
| TK0235                                     | Predicted permease, major facilitator superfamily                                  |
| TK0326                                     | ABC-type multidrug transport system, ATPase component                              |

TK0355 ABC-type multidrug transport system, ATPase component  
TK0436 ABC-type transporter, ATPase component, fused to acetyltransferase domain  
TK0657 ABC-type transport system, probable periplasmic component  
TK0658 ABC-type transport system, ATPase component  
TK0659 ABC-type transport system, permease component  
TK0660 ABC-type transport system, permease component  
TK0676 ABC-type multidrug transport system, ATPase and permease components  
TK0692 Predicted permease  
TK0694 ABC-type multidrug transport system, ATPase component  
TK0726 ABC-type multidrug transport system, permease component  
TK0727 ABC-type multidrug transport system, ATPase component  
TK0774 Predicted permease, auxin efflux carrier family  
TK0827 Predicted permease, major facilitator superfamily  
TK0833 Predicted permease, major facilitator superfamily  
TK0942 ABC-type multidrug transport system, ATPase component  
TK0974 Sodium-driven multidrug efflux pump protein  
TK1007 Predicted permease, major facilitator superfamily  
TK1011 Permease, major facilitator superfamily, flame shift  
TK1012 Permease, major facilitator superfamily, flame shift  
TK1044 Predicted permease, major facilitator superfamily  
TK1144 ABC-type multidrug transport system, ATPase component  
TK1145 ABC-type multidrug transport system, permease component  
TK1151 ABC-type transport system, permease component  
TK1152 ABC-type multidrug transport system, ATPase component  
TK1267 Permease, drug/metabolite transporter (DMT) superfamily  
TK1288 Sodium-driven multidrug efflux pump protein  
TK1289 Sodium-driven multidrug efflux pump protein  
TK1399 Predicted permease, major facilitator superfamily  
TK1400 Predicted permease, major facilitator superfamily  
TK1452 ABC-type multidrug transport system, ATPase and permease components  
TK1547 Predicted permease, major facilitator superfamily  
TK1579 ABC-type multidrug transport system, ATPase component  
TK1588 ABC-type multidrug transport system, ATPase component  
TK1655 Predicted permease, major facilitator superfamily  
TK1745 Permease, drug/metabolite transporter (DMT) superfamily  
TK1792 Permease, drug/metabolite transporter (DMT) superfamily  
TK1797 Permease, drug/metabolite transporter (DMT) superfamily  
TK1829 Permease, major facilitator superfamily  
TK1858 Predicted permease, containing FtsX domains  
TK1876 Permease, drug/metabolite transporter (DMT) superfamily  
TK1936 ABC-type multidrug transport system, ATPase component  
TK1938 ABC-type transport system, probable permease component  
TK1992 Permease, major facilitator superfamily  
TK2026 ABC-type multidrug transport system, ATPase component  
TK2027 ABC-type multidrug transport system, permease component  
TK2028 ABC-type multidrug transport system, permease component  
TK2036 Permease, drug/metabolite transporter (DMT) superfamily  
TK2053 ABC-type multidrug transport system, ATPase component  
TK2054 ABC-type transport system, probable permease component  
TK2055 ABC-type transport system, probable permease component  
TK2161 ABC-type multidrug transport system, ATPase component  
TK2186 Predicted permease, containing DUF6 domain  
TK2247 Predicted permease, major facilitator superfamily  
TK2251 Permease, major facilitator superfamily  
TK2266 Predicted permease, major facilitator superfamily  
TK2281 ABC-type multidrug transport system, ATPase component

#### General function prediction only

##### *Acetyltransferases*

TK0125 N-Acetyltransferase, GNAT family  
TK0232 N-Acetyltransferase, GNAT family  
TK0331 N-Acetyltransferase, GNAT family  
TK0538 N-Acetyltransferase, GNAT family  
TK1054 N-Acetyltransferase, GNAT family  
TK1174 Predicted acetyltransferase, isoleucine patch superfamily

##### *ATPases, GTPases, and ATP/GTP-binding proteins*

TK0012 GTP-binding protein  
TK0140 Archaeal ATPase, fused to C-terminal DUF234 domain  
TK0285 Archaeal ATPase, fused to C-terminal DUF234 domain, degenerate  
TK0286 Archaeal ATPase, fused to C-terminal DUF234 domain, degenerate  
TK0287 Archaeal ATPase, fused to C-terminal DUF234 domain, degenerate  
TK0459 Archaeal ATPase  
TK0498 Predicted ATPase, AAA superfamily  
TK0506 Predicted GTPase, containing TGS domain  
TK0557 Predicted ATPase, DUF265 family  
TK0754 Predicted ATPase, DUF699 family, fused to acetyltransferase domain  
TK0776 Archaeal ATPase  
TK0861 ATP-binding protein  
TK0953 Predicted ATPase, AAA superfamily, containing PIN and KH nucleic acid-binding domains  
TK0960 Predicted ATPase, PP-loop superfamily  
TK1048 ATPase, RecA superfamily  
TK1139 ATPase, AAA superfamily  
TK1190 Predicted GTPase, containing NOG1 domain  
TK1236 Archaeal ATPase

TK1283 Predicted ATPase, PP-loop superfamily  
TK1286 Predicted GTPase, GTP1/OBG family, containing TGS domain  
TK1314 Predicted ATPase, AAA superfamily  
TK1465 Archaeal ATPase, fused to C-terminal DUF234 domain  
TK1544 Archaeal ATPase, fused to C-terminal DUF234 domain  
TK1549 Predicted ATPase  
TK1551 Predicted ATPase, PP-loop superfamily  
TK1556 ATPase, PP-loop superfamily  
TK1573 Archaeal ATPase, fused to C-terminal DUF234 domain  
TK1590 Predicted ATPase, AAA superfamily  
TK1692 Predicted ATPase, PP-loop superfamily  
TK1789 ATPase, RecA superfamily  
TK1821 ATPase, PP-loop superfamily  
TK1822 Predicted ATPase, AAA superfamily  
TK1846 MoxR-related ATPase, AAA superfamily  
TK1857 GTPase, MMR1/HSR1 family  
TK1877 Archaeal ATPase, fused to C-terminal DUF234 domain  
TK1910 ATPase, RecA superfamily  
TK1932 ATPase, RecA superfamily  
TK1954 Probable GTP-binding protein  
TK1976 HflX-related GTP-binding protein  
TK2042 ATPase, RecA superfamily  
TK2098 Predicted ATPase, AAA superfamily  
TK2202 Predicted ATPase, AAA superfamily  
TK2220 Archaeal ATPase  
TK2222 Archaeal ATPase  
TK2280 ATP-binding protein

#### *DNA/RNA-binding proteins*

TK0016 Predicted nucleic acid-binding protein, containing PIN domain  
TK0066 Predicted nucleic acid-binding protein, containing PIN domain  
TK0128 Predicted nucleic acid-binding protein, containing PIN domain  
TK0137 Predicted nucleic acid-binding protein, containing PIN domain  
TK0143 Nucleic acid-binding protein, containing C2H2 zinc-finger  
TK0176 Predicted nucleic acid-binding protein, containing PIN domain  
TK0191 Predicted nucleic acid-binding protein, containing PIN domain  
TK0212 Predicted nucleic acid-binding protein, containing PIN domain  
TK0239 Putative tRNA-binding protein  
TK0334 Predicted nucleic acid-binding protein, containing PIN domain  
TK0337 Predicted nucleic acid-binding protein, containing PIN domain and zinc-ribbon module  
TK0343 Predicted nucleic acid-binding protein, containing PIN domain  
TK0374 Predicted nucleic acid-binding protein, containing PIN domain  
TK0456 Predicted nucleic acid-binding protein, containing PIN domain  
TK0481 RNA-binding protein, containing KH domain  
TK0542 Predicted nucleic acid-binding protein, containing PIN domain  
TK0553 Nucleic acid-binding protein, containing OB-fold domain  
TK0562 Predicted DNA-binding protein, DUF134 family  
TK0649 Putative tRNA-binding protein  
TK0734 Predicted nucleic acid-binding protein, containing PIN domain  
TK0796 DNA-binding protein, containing HTH domain of resolvase  
TK0800 RNA-binding protein, containing KH domain  
TK0889 Predicted nucleic acid-binding protein, containing PIN domain  
TK0903 RNA-binding protein, containing THUMP domain  
TK0907 DNA-binding protein Translin homolog  
TK0910 Predicted nucleic acid-binding protein, containing PIN domain  
TK0924 Predicted nucleic acid-binding protein, containing PIN domain  
TK0956 LexA-related DNA-binding protein  
TK0972 Predicted nucleic acid-binding protein, containing PIN domain  
TK0998 Predicted nucleic acid-binding protein, containing PIN domain  
TK1014 Predicted nucleic acid-binding protein, containing PIN domain  
TK1027 Predicted nucleic acid-binding protein, containing PIN domain  
TK1101 RNA-binding protein, Nop10p family  
TK1112 RNA-binding protein, containing KH domain  
TK1118 Predicted nucleic acid-binding protein, containing PIN domain  
TK1169 RNA-binding protein, containing S1 domain  
TK1185 Predicted nucleic acid-binding protein, containing PIN domain  
TK1256 Predicted nucleic acid-binding protein, containing PIN domain  
TK1257 RNA-binding protein, containing THUMP domain  
TK1275 Predicted RNA-binding protein, CRS1/YhbY family  
TK1278 Double-stranded DNA-binding protein  
TK1290 Predicted nucleic acid-binding protein, containing PIN domain  
TK1644 Predicted nucleic acid-binding protein, containing PIN domain  
TK1751 Predicted nucleic acid-binding protein, containing PIN domain  
TK1763 Predicted nucleic acid-binding protein, containing PIN domain  
TK1945 Predicted nucleic acid-binding protein, containing PIN domain  
TK1995 Predicted nucleic acid-binding protein, containing PIN domain  
TK2005 Predicted nucleic acid-binding protein, containing PIN domain  
TK2065 Predicted RNA-binding protein, containing TRAM domain  
TK2067 Predicted nucleic acid-binding protein, containing PIN domain  
TK2097 RNA-binding protein, containing THUMP domain  
TK2155 Predicted nucleic acid-binding protein, containing PIN domain  
TK2156 RNA-binding protein, containing PUA domain  
TK2227 RNA-binding protein FAU-1  
TK2228 Predicted nucleic acid-binding protein, containing PIN domain



|                                |                                                                                       |
|--------------------------------|---------------------------------------------------------------------------------------|
| TK2262                         | Predicted nucleic acid-binding protein, containing PIN domain                         |
| TK2275                         | RNA-binding protein, containing PUA domain                                            |
| TK2306                         | Predicted nucleic acid-binding protein, containing PIN domain                         |
| <i>Hydrolases</i>              |                                                                                       |
| TK0014                         | Metal-dependent phosphohydrolase, HD superfamily                                      |
| TK0029                         | Zinc-dependent hydrolase, glyoxylase II family                                        |
| TK0058                         | Hydrolase, HAD superfamily                                                            |
| TK0110                         | Hydrolase, HAD superfamily                                                            |
| TK0141                         | Hydrolase, metallo-beta-lactamase superfamily                                         |
| TK0238                         | Carbon-nitrogen hydrolase                                                             |
| TK0251                         | Predicted hydrolase, HAD superfamily                                                  |
| TK0288                         | Phosphonate metabolism protein PhnP homolog, metallo-beta-lactamase superfamily       |
| TK0303                         | Membrane-bound metal-dependent hydrolase                                              |
| TK0312                         | Metal-dependent phosphohydrolase, HD superfamily                                      |
| TK0313                         | ArgE/DapE-related deacylase                                                           |
| TK0314                         | Hydrolase, metallo-beta-lactamase superfamily                                         |
| TK0327                         | Phosphohydrolase, PHP family                                                          |
| TK0365                         | Membrane-bound phosphoesterase, PAP2 superfamily                                      |
| TK0449                         | Metal-dependent phosphohydrolase, HD superfamily                                      |
| TK0477                         | Hydrolase, HAD superfamily                                                            |
| TK0480                         | Metal-dependent phosphohydrolase, HD superfamily                                      |
| TK0540                         | Metal-dependent phosphohydrolase, HD superfamily                                      |
| TK0547                         | Metallophosphoesterase, calcineurin superfamily                                       |
| TK0574                         | Metallophosphoesterase, calcineurin superfamily                                       |
| TK0645                         | Predicted phosphohydrolase, DHH family                                                |
| TK0667                         | Metallophosphoesterase, calcineurin superfamily                                       |
| TK0686                         | Hydrolase, HAD superfamily                                                            |
| TK0688                         | Membrane-associated phosphatase, PAP2 superfamily                                     |
| TK0712                         | Hydrolase, metallo-beta-lactamase superfamily                                         |
| TK0735                         | Hydrolase, metallo-beta-lactamase superfamily                                         |
| TK0758                         | Metal-dependent amidohydrolase                                                        |
| TK0874                         | Predicted metallophosphoesterase, calcineurin superfamily                             |
| TK0887                         | Phosphohydrolase, PHP family                                                          |
| TK0968                         | Predicted hydrolase, HAD superfamily                                                  |
| TK1037                         | Metallophosphoesterase, calcineurin superfamily                                       |
| TK1071                         | Phosphodiesterase                                                                     |
| TK1137                         | Acid phosphatase SurE homolog                                                         |
| TK1269                         | Predicted phosphoesterase, DHH family, fused to NAD-binding TrkA-N domain             |
| TK1383                         | Hydrolase, HAD superfamily                                                            |
| TK1386                         | Metallophosphoesterase, calcineurin superfamily                                       |
| TK1401                         | Hydrolase, alpha/beta superfamily                                                     |
| TK1466                         | ArgE/DapE-related deacylase                                                           |
| TK1469                         | Hydrolase, metallo-beta-lactamase superfamily                                         |
| TK1605                         | Hydrolase, metallo-beta-lactamase superfamily                                         |
| TK1611                         | Predicted metal-dependent hydrolase                                                   |
| TK1618                         | Metallophosphoesterase, calcineurin superfamily                                       |
| TK1652                         | Predicted thioesterase                                                                |
| TK1681                         | Predicted hydrolase, metallo-beta-lactamase superfamily                               |
| TK1734                         | Predicted sugar phosphatase, HAD superfamily                                          |
| TK1778                         | Predicted hydrolase, metallo-beta-lactamase superfamily                               |
| TK1781                         | ArgE/DapE-related deacylase                                                           |
| TK1811                         | Hydrolase, HAD superfamily                                                            |
| TK1878                         | Alkylphosphonate utilization protein PhnP homolog, metallo-beta-lactamase superfamily |
| TK1916                         | Carbon-nitrogen hydrolase                                                             |
| TK1944                         | Predicted metal-dependent phosphohydrolase, HD superfamily                            |
| TK2062                         | Metallophosphoesterase, calcineurin superfamily                                       |
| TK2099                         | Predicted membrane-bound metal-dependent hydrolase                                    |
| TK2166                         | ArgE/DapE-related deacylase                                                           |
| TK2232                         | Hydrolase, metallo-beta-lactamase superfamily                                         |
| TK2288                         | Metallophosphoesterase, calcineurin superfamily                                       |
| TK2301                         | Hydrolase, HAD superfamily                                                            |
| <i>Methyltransferases</i>      |                                                                                       |
| TK0037                         | SAM-dependent methyltransferase, UbiE/COQ5 family                                     |
| TK0224                         | SAM-dependent methyltransferase, UbiE/COQ5 family                                     |
| TK0234                         | Predicted SAM-dependent methyltransferase                                             |
| TK0704                         | SAM-dependent methyltransferase, UbiE/COQ5 family                                     |
| TK0729                         | SAM-dependent methyltransferase, UbiE/COQ5 family                                     |
| TK1273                         | SAM-dependent methyltransferase, UbiE/COQ5 family                                     |
| TK1784                         | Predicted SAM-dependent methyltransferase, DUF890 family                              |
| TK1917                         | Predicted SAM-dependent methyltransferase                                             |
| TK2045                         | SAM-dependent methyltransferase, UPF0020 family                                       |
| TK2241                         | SAM-dependent methyltransferase, UbiE/COQ5 family                                     |
| <i>Nucleotidyltransferases</i> |                                                                                       |
| TK0063                         | Nucleotidyltransferase, fused to N-terminal DNA-binding domain                        |
| TK0222                         | Nucleotidyltransferase                                                                |
| TK0341                         | Nucleotidyltransferase, fused to N-terminal DNA-binding domain                        |
| TK0674                         | Nucleotidyltransferase                                                                |
| TK0945                         | Nucleotidyltransferase                                                                |
| TK0962                         | Nucleotidyltransferase                                                                |
| TK1073                         | Nucleotidyltransferase                                                                |
| TK1128                         | Nucleotidyltransferase                                                                |
| TK1476                         | Nucleotidyltransferase                                                                |
| TK1709                         | Nucleotidyltransferase                                                                |

TK1994 Nucleotidyltransferase

*Others*

TK0187 Predicted glutamine amidotransferase, class I  
TK0319 Pterin-binding protein  
TK0549 Carbamoyl transferase, NodU family  
TK0939 GHMP kinase  
TK1035 Predicted glutamine amidotransferase, class II  
TK1473 Amino acid kinase  
TK1843 Carbohydrate/pyrimidine kinase, PfkB family  
TK1886 YjeF-related probable carbohydrate kinase  
TK2029 Carbohydrate/pyrimidine kinase, PfkB family  
TK2141 GHMP kinase  
TK2242 GHMP kinase  
TK2285 Carbohydrate/pyrimidine kinase, PfkB family

**Unknown function**

TK0005 CoA-binding protein  
TK0030 Cyclase-related protein  
TK0071 Met-10+ like protein  
TK0200 Phosphoenolpyruvate synthetase-related protein  
TK0228 Met-10+ like protein (C-terminus)  
TK0358 RNA terminal phosphate cyclase operon orfB homolog, UPF0027 family  
TK0497 Met-10+ like protein  
TK0563 6-Pyruvoyl-tetrahydropterin synthase-related protein  
TK0779 Sugar fermentation stimulation protein  
TK0786 Integral membrane protein Rhomboid homolog  
TK0831 Peroxiredoxin-related protein (C-terminus)  
TK0881 Universal stress protein  
TK0984 Alanyl-tRNA synthetase-related protein (partial)  
TK0991 Carbon starvation protein A  
TK1059 Ferritin-related protein  
TK1189 Bacitracin resistance protein BacA homolog  
TK1205 Phospholipid-binding protein, PBP family  
TK1382 Dopamine beta hydroxylase-related protein, containing DOMON domain  
TK1404 Phosphomannomutase-related protein  
TK1438 Predicted fibronectin-binding protein  
TK1497 Enolase-related protein  
TK1550 Asparaginyl-tRNA synthetase-related protein (N-truncation)  
TK1563 Phospholipase D-related protein  
TK1607 Alanyl-tRNA synthetase-related protein (C-terminus)  
TK1890 Histone macroH2A-related protein (C-terminus)  
TK1893 Glycerate kinase-related protein, containing MOFRL domain (C-terminus)  
TK1974 Carboxymuconolactone decarboxylase-related protein  
TK1999 Ferritin-like protein  
TK2034 Universal stress protein  
TK2109 Biotin synthase-related protein, radical SAM superfamily  
TK2181 Predicted calcium-binding protein  
TK2223 Met-10+ like protein  
TK2248 Biotin synthase-related protein, radical SAM superfamily  
TK2264 Predicted calcium-binding protein

**Mobile elements**

*Transposon-related functions*

TK0298 Probable transposase  
TK0495 Probable transposase  
TK0654 Probable transposase  
TK0655 Predicted site-specific integrase/resolvase  
TK0850 Probable transposase  
TK0931 Probable transposase  
TK0932 IS200-like transposase  
TK1841 Predicted site-specific integrase-resolvase  
TK1842 Probable transposase

*TKV1*

TK0073 SSV1 integrase homolog, C-fragment  
TK0074 Hypothetical protein  
TK0075 Hypothetical protein  
TK0076 Subtilisin-like serine protease precursor  
TK0077 Hypothetical membrane protein  
TK0078 Hypothetical membrane protein  
TK0079 Hypothetical membrane protein  
TK0080 Hypothetical membrane protein  
TK0081 Hypothetical protein  
TK0082 Hypothetical protein  
TK0083 Hypothetical membrane protein  
TK0084 Hypothetical protein  
TK0085 Hypothetical membrane protein  
TK0086 Predicted transcription regulator, ArsR family  
TK0087 Hypothetical protein  
TK0088 Hypothetical membrane protein, conserved  
TK0089 Hypothetical protein  
TK0090 Hypothetical protein  
TK0091 Hypothetical protein  
TK0092 Hypothetical membrane protein  
TK0093 Hypothetical membrane protein  
TK0094 Transcription regulator, SpoVT/AbrB family

|             |                                                                           |
|-------------|---------------------------------------------------------------------------|
| TK0095      | Hypothetical protein                                                      |
| TK0096      | DNA replication licensing factor, MCM2/3/5 family                         |
| TK0097      | Hypothetical protein                                                      |
| TK0098      | Hypothetical protein                                                      |
| TK0099      | Hypothetical protein                                                      |
| TK0100      | Hypothetical protein                                                      |
| TK0101      | Hypothetical protein                                                      |
| TK0102      | Hypothetical protein, conserved                                           |
| TK0103      | Hypothetical protein                                                      |
| TK0104      | Probable integrase/recombinase                                            |
| TK0105      | SSV1 integrase homolog, N-fragment                                        |
| <i>TKV2</i> |                                                                           |
| TK0381      | SSV1 integrase homolog, C-fragment                                        |
| TK0382      | Hypothetical protein                                                      |
| TK0383      | Hypothetical protein                                                      |
| TK0384      | Hypothetical membrane protein, conserved                                  |
| TK0385      | Hypothetical protein, conserved                                           |
| TK0386      | Hypothetical membrane protein, conserved                                  |
| TK0387      | Hypothetical membrane protein, conserved                                  |
| TK0388      | Hypothetical membrane protein, conserved                                  |
| TK0389      | Hypothetical membrane protein, conserved                                  |
| TK0390      | Hypothetical protein, conserved                                           |
| TK0391      | Hypothetical protein, conserved, containing leucine zipper motif          |
| TK0392      | Hypothetical protein, conserved                                           |
| TK0393      | Hypothetical membrane protein, conserved, containing leucine zipper motif |
| TK0394      | Predicted ATPase, AAA superfamily                                         |
| TK0395      | Hypothetical protein, conserved                                           |
| TK0396      | Hypothetical protein                                                      |
| TK0397      | Hypothetical membrane protein, conserved                                  |
| TK0398      | Hypothetical protein                                                      |
| TK0399      | Hypothetical protein                                                      |
| TK0400      | Hypothetical protein                                                      |
| TK0401      | Hypothetical protein, conserved                                           |
| TK0402      | Predicted transcription regulator, SpoVT/AbrB family                      |
| TK0403      | Hypothetical membrane protein, conserved                                  |
| TK0404      | Hypothetical protein, conserved                                           |
| TK0405      | Predicted transcription regulator, SpoVT/AbrB family                      |
| TK0406      | Predicted transcription regulator, SpoVT/AbrB family                      |
| TK0407      | Hypothetical protein                                                      |
| TK0408      | Hypothetical protein, conserved                                           |
| TK0409      | Predicted transcription regulator, SpoVT/AbrB family                      |
| TK0410      | Hypothetical protein, conserved                                           |
| TK0411      | Hypothetical protein, conserved                                           |
| TK0412      | Hypothetical protein                                                      |
| TK0413      | Hypothetical protein                                                      |
| TK0414      | Hypothetical protein                                                      |
| TK0415      | Hypothetical protein                                                      |
| TK0416      | Hypothetical protein, conserved                                           |
| TK0417      | Hypothetical membrane protein                                             |
| TK0418      | Hypothetical protein                                                      |
| TK0419      | Hypothetical protein                                                      |
| TK0420      | Hypothetical protein, conserved                                           |
| TK0421      | Predicted integrase, N-fragment                                           |
| <i>TKV3</i> |                                                                           |
| TK0575      | Predicted integrase, N-fragment                                           |
| TK0576      | Hypothetical protein, conserved                                           |
| TK0577      | Hypothetical protein                                                      |
| TK0578      | Hypothetical protein, conserved                                           |
| TK0579      | Hypothetical protein                                                      |
| TK0580      | Hypothetical protein                                                      |
| TK0581      | Hypothetical protein                                                      |
| TK0582      | DNA polymerase sliding clamp (proliferating cell nuclear antigen)         |
| TK0583      | Hypothetical protein                                                      |
| TK0584      | Hypothetical protein                                                      |
| TK0585      | Hypothetical protein                                                      |
| TK0586      | Hypothetical protein                                                      |
| TK0587      | Hypothetical protein                                                      |
| TK0588      | Predicted transcription regulator, SpoVT/AbrB family                      |
| TK0589      | Hypothetical protein                                                      |
| TK0590      | Hypothetical protein                                                      |
| TK0591      | Predicted N-acetyltransferase, GNAT family                                |
| TK0592      | Hypothetical protein, conserved                                           |
| TK0593      | Hypothetical protein, conserved                                           |
| TK0594      | Hypothetical membrane protein                                             |
| TK0595      | Hypothetical membrane protein                                             |
| TK0596      | Hypothetical membrane protein                                             |
| TK0597      | Hypothetical protein                                                      |
| TK0598      | Hypothetical protein                                                      |
| TK0599      | Hypothetical protein                                                      |
| TK0600      | Hypothetical protein, conserved                                           |
| TK0601      | Predicted ATPase, AAA superfamily                                         |
| TK0602      | Hypothetical protein, conserved, containing leucine zipper motif          |
| TK0603      | Hypothetical protein, conserved                                           |

TK0604 Hypothetical protein, conserved, containing leucine zipper motif  
 TK0605 Hypothetical protein, conserved  
 TK0606 Hypothetical membrane protein, conserved  
 TK0607 Hypothetical membrane protein, conserved  
 TK0608 Hypothetical membrane protein, conserved  
 TK0609 Hypothetical membrane protein, conserved  
 TK0610 Hypothetical protein, conserved  
 TK0611 Hypothetical membrane protein, conserved  
 TK0612 Hypothetical protein  
 TK0613 Hypothetical membrane protein  
 TK0614 SSV1 integrase homolog, C-fragment

#### TKV4

TK1342 Predicted integrase, C-fragment  
 TK1343 Predicted nucleic acid-binding protein, containing PIN domain  
 TK1344 Hypothetical protein  
 TK1345 Hypothetical protein  
 TK1346 Hypothetical protein  
 TK1347 Hypothetical protein  
 TK1348 Hypothetical protein  
 TK1349 Hypothetical protein, conserved  
 TK1350 Hypothetical protein, containing leucine zipper motif  
 TK1351 Hypothetical membrane protein  
 TK1352 Hypothetical protein  
 TK1353 Hypothetical protein  
 TK1354 Hypothetical protein  
 TK1355 Hypothetical membrane protein  
 TK1356 Predicted ATPase, AAA superfamily  
 TK1357 Hypothetical protein  
 TK1358 Hypothetical protein  
 TK1359 Hypothetical protein  
 TK1360 Hypothetical protein  
 TK1361 DNA replication licensing factor, MCM2/3/5 family  
 TK1362 Hypothetical membrane protein  
 TK1363 Hypothetical protein  
 TK1364 Hypothetical protein  
 TK1365 Hypothetical protein  
 TK1366 Hypothetical protein  
 TK1367 Hypothetical protein  
 TK1368 Hypothetical protein  
 TK1369 Hypothetical protein, conserved  
 TK1370 Hypothetical protein  
 TK1371 Hypothetical protein  
 TK1372 Predicted transcription regulator, SpoVT/AbrB family  
 TK1373 Hypothetical protein  
 TK1374 Hypothetical protein, conserved  
 TK1375 Hypothetical membrane protein  
 TK1376 Hypothetical protein  
 TK1377 Hypothetical protein  
 TK1378 Predicted integrase, N-fragment

#### Hypothetical proteins, conserved

TK0003 Hypothetical membrane protein, conserved  
 TK0004 Hypothetical membrane protein, conserved  
 TK0006 Hypothetical protein, conserved  
 TK0007 Hypothetical protein, conserved  
 TK0009 Hypothetical protein, conserved  
 TK0011 Hypothetical protein, conserved, UPF0047 family  
 TK0013 Hypothetical protein, conserved  
 TK0020 Hypothetical protein, conserved  
 TK0022 Hypothetical protein, conserved, Band 7 family  
 TK0023 Hypothetical protein, conserved  
 TK0024 Hypothetical protein, conserved  
 TK0025 Hypothetical membrane protein, conserved  
 TK0027 Hypothetical protein, conserved, UPF0066 family  
 TK0032 Hypothetical protein, conserved  
 TK0033 Hypothetical protein, conserved, containing leucine zipper motif  
 TK0034 Hypothetical protein, conserved  
 TK0035 Hypothetical membrane protein, conserved  
 TK0036 Hypothetical protein, conserved, DUF1495 family  
 TK0050 Hypothetical membrane protein, conserved  
 TK0054 Hypothetical protein, conserved  
 TK0055 Hypothetical protein, conserved, DUF1530 family  
 TK0056 Hypothetical protein, conserved, DUF437 family  
 TK0060 Hypothetical protein, conserved, DUF127 family  
 TK0061 Hypothetical protein, conserved  
 TK0062 Hypothetical protein, conserved, DUF62 family  
 TK0064 Hypothetical protein, conserved, DUF103 family  
 TK0065 Hypothetical protein, conserved  
 TK0068 Hypothetical membrane protein, conserved  
 TK0070 Hypothetical protein, conserved  
 TK0108 Hypothetical membrane protein, conserved  
 TK0109 Hypothetical protein, conserved  
 TK0113 Hypothetical protein, conserved  
 TK0114 Hypothetical protein, conserved

|        |                                                                         |
|--------|-------------------------------------------------------------------------|
| TK0129 | Hypothetical protein, conserved, DUF356 family                          |
| TK0130 | Hypothetical protein, conserved, DUF114 family                          |
| TK0131 | Hypothetical protein, conserved, DUF505 family                          |
| TK0133 | Hypothetical protein, conserved                                         |
| TK0144 | Hypothetical protein, conserved                                         |
| TK0145 | Hypothetical membrane protein, conserved                                |
| TK0146 | Hypothetical membrane protein, conserved                                |
| TK0148 | Hypothetical protein, conserved                                         |
| TK0152 | Hypothetical membrane protein, conserved                                |
| TK0154 | Hypothetical protein, conserved                                         |
| TK0163 | Hypothetical membrane protein, conserved                                |
| TK0167 | Hypothetical protein, conserved, radical SAM superfamily                |
| TK0171 | Hypothetical protein, conserved                                         |
| TK0172 | Hypothetical membrane protein, conserved, DUF373 family                 |
| TK0173 | Hypothetical protein, conserved, DUF77 family                           |
| TK0174 | Hypothetical protein, conserved, AMMECR1 family                         |
| TK0175 | Hypothetical protein, conserved, DUF207 family                          |
| TK0177 | Hypothetical protein, conserved                                         |
| TK0179 | Hypothetical protein, conserved, DUF35 family                           |
| TK0182 | Hypothetical protein, conserved, DUF124 family                          |
| TK0188 | Hypothetical protein, conserved, radical SAM superfamily                |
| TK0192 | Hypothetical protein, conserved, DUF104 family                          |
| TK0195 | Hypothetical membrane protein, conserved, containing DUF835 domain      |
| TK0196 | Hypothetical protein, conserved, containing DUF1246 and DUF1297 domains |
| TK0203 | Hypothetical protein, conserved, containing DUF1246 and DUF1297 domains |
| TK0205 | Hypothetical protein, conserved                                         |
| TK0206 | Hypothetical protein, conserved                                         |
| TK0213 | Hypothetical protein, conserved, UPF0175 family                         |
| TK0215 | Hypothetical protein, conserved                                         |
| TK0221 | Hypothetical protein, conserved, DUF712 family                          |
| TK0226 | Hypothetical protein, conserved                                         |
| TK0227 | Hypothetical protein, conserved                                         |
| TK0271 | Hypothetical protein, conserved                                         |
| TK0291 | Hypothetical protein, conserved                                         |
| TK0292 | Hypothetical protein, conserved, DUF82 family                           |
| TK0293 | Hypothetical protein, conserved, DUF115 family                          |
| TK0299 | Hypothetical protein, conserved                                         |
| TK0310 | Hypothetical protein, conserved                                         |
| TK0311 | Hypothetical protein, conserved                                         |
| TK0315 | Hypothetical protein, conserved, DUF504 family                          |
| TK0318 | Hypothetical protein, conserved                                         |
| TK0320 | Hypothetical protein, conserved, DUF72 family                           |
| TK0322 | Hypothetical membrane protein, conserved                                |
| TK0323 | Hypothetical membrane protein, conserved                                |
| TK0324 | Hypothetical membrane protein, conserved                                |
| TK0325 | Hypothetical membrane protein, conserved                                |
| TK0335 | Hypothetical protein, conserved, DUF104 family                          |
| TK0336 | Hypothetical protein, conserved, LamB/YcsF family                       |
| TK0339 | Hypothetical protein, conserved, containing leucine zipper motif        |
| TK0340 | Hypothetical protein, conserved, DUF103 family                          |
| TK0342 | Hypothetical protein, conserved                                         |
| TK0346 | Hypothetical protein, conserved                                         |
| TK0350 | Hypothetical protein, conserved                                         |
| TK0351 | Hypothetical protein, conserved                                         |
| TK0356 | Hypothetical membrane protein, conserved                                |
| TK0357 | Hypothetical membrane protein, conserved                                |
| TK0359 | Hypothetical protein, conserved                                         |
| TK0361 | Hypothetical protein, conserved, DUF101 family                          |
| TK0367 | Hypothetical membrane protein, conserved, DUF998 family                 |
| TK0373 | Hypothetical protein, conserved                                         |
| TK0377 | Hypothetical protein, conserved, DUF835 family (C-terminus)             |
| TK0379 | Hypothetical protein, conserved, DUF763 family                          |
| TK0380 | Hypothetical protein, conserved, DUF89 family                           |
| TK0431 | Hypothetical protein, conserved, containing DUF1246 and DUF1297 domains |
| TK0440 | Hypothetical protein, conserved                                         |
| TK0442 | Hypothetical protein, conserved                                         |
| TK0445 | Hypothetical protein, conserved, DUF196 family                          |
| TK0446 | Hypothetical protein, conserved                                         |
| TK0451 | Hypothetical protein, conserved                                         |
| TK0453 | Hypothetical protein, conserved, DUF73 family, insertion                |
| TK0454 | Hypothetical protein, conserved                                         |
| TK0455 | Hypothetical protein, conserved, DUF48 family                           |
| TK0462 | Hypothetical protein, conserved                                         |
| TK0463 | Hypothetical protein, conserved                                         |
| TK0466 | Hypothetical protein, conserved                                         |
| TK0467 | Hypothetical protein, conserved                                         |
| TK0468 | Hypothetical protein, conserved                                         |
| TK0469 | Hypothetical protein, conserved, containing SWIM zinc finger domain     |
| TK0472 | Hypothetical protein, conserved                                         |
| TK0473 | Hypothetical protein, conserved, UPF0148 family                         |
| TK0476 | Hypothetical protein, conserved, containing leucine zipper motif        |
| TK0478 | Hypothetical protein, conserved                                         |
| TK0479 | Hypothetical protein, conserved                                         |

|        |                                                                              |
|--------|------------------------------------------------------------------------------|
| TK0482 | Hypothetical protein, conserved                                              |
| TK0483 | Hypothetical protein, conserved                                              |
| TK0484 | Hypothetical protein, conserved                                              |
| TK0485 | Hypothetical protein, conserved                                              |
| TK0486 | Hypothetical protein, conserved                                              |
| TK0487 | Hypothetical protein, conserved                                              |
| TK0488 | Hypothetical protein, conserved                                              |
| TK0489 | Hypothetical protein, conserved                                              |
| TK0490 | Hypothetical protein, conserved                                              |
| TK0491 | Hypothetical protein, conserved, containing ATP/GTP-binding site motif A     |
| TK0493 | Hypothetical membrane protein, conserved, containing DUF11 domain            |
| TK0500 | Hypothetical protein, conserved                                              |
| TK0501 | Hypothetical protein, conserved                                              |
| TK0503 | Hypothetical protein, conserved, cupin superfamily                           |
| TK0510 | Hypothetical protein, conserved, DUF147 family                               |
| TK0513 | Hypothetical protein, conserved                                              |
| TK0515 | Hypothetical protein, conserved, DUF190 family                               |
| TK0518 | Hypothetical protein, conserved                                              |
| TK0519 | Hypothetical protein, conserved, UPF0029 family                              |
| TK0526 | Hypothetical membrane protein, conserved                                     |
| TK0527 | Hypothetical protein, conserved                                              |
| TK0529 | Hypothetical protein, conserved                                              |
| TK0534 | Hypothetical protein, conserved                                              |
| TK0536 | Hypothetical protein, conserved                                              |
| TK0546 | Hypothetical protein, conserved                                              |
| TK0554 | Hypothetical protein, conserved, DUF358 family                               |
| TK0558 | Hypothetical protein, conserved, containing CBS domains and PHD finger motif |
| TK0565 | Hypothetical protein, conserved, DUF296 family                               |
| TK0569 | Hypothetical protein, conserved                                              |
| TK0573 | Hypothetical protein, conserved, DUF447 family                               |
| TK0628 | Hypothetical protein, conserved                                              |
| TK0640 | Hypothetical protein, conserved, containing leucine zipper motif             |
| TK0641 | Hypothetical protein, conserved, DUF439 family                               |
| TK0642 | Hypothetical protein, conserved                                              |
| TK0644 | Hypothetical protein, conserved                                              |
| TK0646 | Hypothetical protein, conserved                                              |
| TK0648 | Hypothetical protein, conserved                                              |
| TK0656 | Hypothetical protein, conserved                                              |
| TK0663 | Hypothetical protein, conserved                                              |
| TK0666 | Hypothetical protein, conserved                                              |
| TK0668 | Hypothetical protein, conserved, containing PRC-barrel domain                |
| TK0670 | Hypothetical protein, conserved                                              |
| TK0675 | Hypothetical protein, conserved, radical SAM superfamily                     |
| TK0687 | Hypothetical protein, conserved, DUF437 family                               |
| TK0689 | Hypothetical membrane protein, conserved                                     |
| TK0691 | Hypothetical membrane protein, conserved, containing DUF835 domain           |
| TK0693 | Hypothetical membrane protein, conserved                                     |
| TK0695 | Hypothetical protein, conserved                                              |
| TK0696 | Hypothetical protein, conserved                                              |
| TK0703 | Hypothetical protein, conserved, radical SAM superfamily                     |
| TK0710 | Hypothetical protein, conserved, DUF364 family                               |
| TK0711 | Hypothetical protein, conserved, UPF0066 family                              |
| TK0713 | Hypothetical membrane protein, conserved                                     |
| TK0720 | Hypothetical protein, conserved                                              |
| TK0721 | Hypothetical protein, conserved                                              |
| TK0725 | Hypothetical protein, conserved                                              |
| TK0728 | Hypothetical membrane protein, conserved                                     |
| TK0733 | Hypothetical protein, conserved, DUF104 family                               |
| TK0737 | Hypothetical protein, conserved (C-terminus)                                 |
| TK0738 | Hypothetical membrane protein, conserved                                     |
| TK0739 | Hypothetical membrane protein, conserved                                     |
| TK0741 | Hypothetical protein, conserved                                              |
| TK0742 | Hypothetical membrane protein, conserved, DUF998 family                      |
| TK0743 | Hypothetical membrane protein, conserved, DUF63 family                       |
| TK0744 | Hypothetical protein, conserved                                              |
| TK0750 | Hypothetical protein, conserved                                              |
| TK0751 | Hypothetical protein, conserved                                              |
| TK0755 | Hypothetical protein, conserved, DUF88 family                                |
| TK0756 | Hypothetical protein, conserved, DUF88 family                                |
| TK0763 | Hypothetical protein, conserved                                              |
| TK0767 | Hypothetical protein, conserved                                              |
| TK0768 | Hypothetical protein, conserved, YggU family                                 |
| TK0769 | Hypothetical protein, conserved, DUF402 family                               |
| TK0771 | Hypothetical protein, conserved (N-terminus)                                 |
| TK0772 | Hypothetical membrane protein, conserved                                     |
| TK0778 | Hypothetical protein, conserved, containing Toprim domain                    |
| TK0783 | Hypothetical membrane protein, conserved                                     |
| TK0788 | Hypothetical membrane protein, conserved, DUF63 family                       |
| TK0790 | Hypothetical protein, conserved, UPF0179 family                              |
| TK0791 | Hypothetical protein, conserved, DUF79 family                                |
| TK0793 | Hypothetical protein, conserved, DUF198 family                               |
| TK0797 | Hypothetical protein, conserved, DUF530 family                               |
| TK0807 | Hypothetical protein, conserved                                              |

|        |                                                                          |
|--------|--------------------------------------------------------------------------|
| TK0808 | Hypothetical protein, conserved                                          |
| TK0811 | Hypothetical protein, conserved                                          |
| TK0813 | Hypothetical protein, conserved, containing leucine zipper motif         |
| TK0821 | Hypothetical membrane protein, conserved                                 |
| TK0822 | Hypothetical membrane protein, conserved, containing DUF835 domain       |
| TK0824 | Hypothetical protein, conserved                                          |
| TK0825 | Hypothetical protein, conserved                                          |
| TK0826 | Hypothetical protein, conserved                                          |
| TK0829 | Hypothetical membrane protein, conserved, DUF998 family                  |
| TK0830 | Hypothetical protein, conserved (N-terminus)                             |
| TK0832 | Hypothetical membrane protein, conserved                                 |
| TK0841 | Hypothetical membrane protein, conserved                                 |
| TK0849 | Hypothetical protein, conserved                                          |
| TK0851 | Hypothetical protein, conserved, N-truncation                            |
| TK0852 | Hypothetical protein, conserved, radical SAM superfamily                 |
| TK0855 | Hypothetical protein, conserved                                          |
| TK0858 | Hypothetical protein, conserved, DUF64 family                            |
| TK0859 | Hypothetical protein, conserved                                          |
| TK0862 | Hypothetical protein, conserved                                          |
| TK0873 | Hypothetical protein, conserved                                          |
| TK0877 | Hypothetical membrane protein, conserved                                 |
| TK0879 | Hypothetical protein, conserved                                          |
| TK0883 | Hypothetical protein, conserved, containing CBS domains                  |
| TK0885 | Hypothetical protein, conserved                                          |
| TK0894 | Hypothetical protein, conserved                                          |
| TK0896 | Hypothetical membrane protein, conserved                                 |
| TK0897 | Hypothetical protein, conserved, radical SAM superfamily                 |
| TK0898 | Hypothetical protein, conserved, C-truncation                            |
| TK0900 | Hypothetical protein, conserved, DUF655 family                           |
| TK0904 | Hypothetical protein, conserved                                          |
| TK0909 | Hypothetical protein, conserved, DUF104 family                           |
| TK0917 | Hypothetical protein, conserved, UPF0175 family                          |
| TK0918 | Hypothetical protein, conserved                                          |
| TK0922 | Hypothetical protein, conserved                                          |
| TK0930 | Hypothetical protein, conserved                                          |
| TK0933 | Hypothetical protein, conserved                                          |
| TK0940 | Hypothetical protein, conserved                                          |
| TK0941 | Hypothetical membrane protein, conserved                                 |
| TK0946 | Hypothetical protein, conserved                                          |
| TK0947 | Hypothetical protein, conserved                                          |
| TK0959 | Hypothetical membrane protein, conserved, UPF0132 family                 |
| TK0963 | Hypothetical protein, conserved, DUF712 family                           |
| TK0965 | Hypothetical protein, conserved, DUF79 family                            |
| TK0966 | Hypothetical protein, conserved                                          |
| TK0971 | Hypothetical membrane protein, conserved, DUF125 family                  |
| TK0973 | Hypothetical protein, conserved                                          |
| TK0979 | Hypothetical membrane protein, conserved, DUF81 family                   |
| TK0992 | Hypothetical protein, conserved                                          |
| TK0993 | Hypothetical protein, conserved                                          |
| TK0995 | Hypothetical protein, conserved, DUF59 family                            |
| TK0996 | Hypothetical membrane protein, conserved                                 |
| TK1001 | Hypothetical protein, conserved                                          |
| TK1003 | Hypothetical protein, conserved                                          |
| TK1006 | Hypothetical protein, conserved                                          |
| TK1013 | Hypothetical protein, conserved, DUF104 family                           |
| TK1016 | Hypothetical protein, conserved (C-terminus)                             |
| TK1018 | Hypothetical protein, conserved, DUF173 family                           |
| TK1019 | Hypothetical protein, conserved                                          |
| TK1020 | Hypothetical membrane protein                                            |
| TK1023 | Hypothetical protein, conserved                                          |
| TK1025 | Hypothetical protein, conserved, containing ATP/GTP-binding site motif A |
| TK1028 | Hypothetical protein, conserved, DUF104 family                           |
| TK1029 | Hypothetical protein, conserved, DUF123 family                           |
| TK1030 | Hypothetical protein, conserved                                          |
| TK1036 | Hypothetical protein, conserved, containing CBS domains                  |
| TK1040 | Hypothetical protein, conserved                                          |
| TK1042 | Hypothetical membrane protein, conserved                                 |
| TK1043 | Hypothetical protein, conserved                                          |
| TK1046 | Hypothetical protein, conserved, containing PKD domain                   |
| TK1050 | Hypothetical membrane protein, conserved                                 |
| TK1053 | Hypothetical membrane protein, conserved, DUF81 family                   |
| TK1060 | Hypothetical protein, conserved                                          |
| TK1061 | Hypothetical protein, conserved                                          |
| TK1067 | Hypothetical protein, conserved, containing DUF650 and DUF651 domains    |
| TK1068 | Hypothetical protein, conserved                                          |
| TK1069 | Hypothetical protein, conserved                                          |
| TK1072 | Hypothetical protein, conserved, DUF103 family                           |
| TK1074 | Hypothetical protein, conserved                                          |
| TK1090 | Hypothetical membrane protein, conserved                                 |
| TK1092 | Hypothetical protein, conserved, containing ATP/GTP-binding site motif A |
| TK1095 | Hypothetical membrane protein, conserved                                 |
| TK1096 | Hypothetical membrane protein, conserved, DUF340 family                  |
| TK1097 | Hypothetical protein, conserved                                          |

|        |                                                                                      |
|--------|--------------------------------------------------------------------------------------|
| TK1102 | Hypothetical protein, conserved, DUF75 family                                        |
| TK1104 | Hypothetical membrane protein, conserved                                             |
| TK1107 | Hypothetical protein, conserved                                                      |
| TK1115 | Hypothetical protein, conserved, containing TPR-repeat domain                        |
| TK1120 | Hypothetical protein, conserved, DUF192 family                                       |
| TK1127 | Hypothetical protein, conserved, DUF103 family                                       |
| TK1135 | Hypothetical protein, conserved, radical SAM superfamily                             |
| TK1136 | Hypothetical protein, conserved                                                      |
| TK1138 | Hypothetical membrane protein, conserved                                             |
| TK1142 | Hypothetical protein, conserved                                                      |
| TK1148 | Hypothetical protein, conserved                                                      |
| TK1150 | Hypothetical membrane protein, conserved                                             |
| TK1153 | Hypothetical protein, conserved                                                      |
| TK1162 | Hypothetical membrane protein, conserved, DUF20 family                               |
| TK1163 | Hypothetical protein, conserved                                                      |
| TK1166 | Hypothetical protein, conserved                                                      |
| TK1168 | Hypothetical protein, conserved                                                      |
| TK1171 | Hypothetical protein, conserved, N-truncation                                        |
| TK1176 | Hypothetical membrane protein, conserved                                             |
| TK1178 | Hypothetical protein, conserved                                                      |
| TK1180 | Hypothetical protein, conserved                                                      |
| TK1184 | Hypothetical protein, conserved                                                      |
| TK1186 | Hypothetical protein, conserved, containing CBS domains                              |
| TK1187 | Hypothetical membrane protein, conserved, containing DUF835 domain                   |
| TK1192 | Hypothetical membrane protein, conserved                                             |
| TK1194 | Hypothetical protein, conserved, DUF555 family                                       |
| TK1195 | Hypothetical protein, conserved, DUF357 family                                       |
| TK1196 | Hypothetical protein, conserved                                                      |
| TK1197 | Hypothetical protein, conserved                                                      |
| TK1201 | Hypothetical protein, conserved                                                      |
| TK1202 | Hypothetical protein, conserved, flame shift                                         |
| TK1203 | Hypothetical protein, conserved, flame shift                                         |
| TK1204 | Hypothetical protein, conserved                                                      |
| TK1206 | Hypothetical membrane protein, conserved                                             |
| TK1207 | Hypothetical protein, conserved                                                      |
| TK1213 | Hypothetical membrane protein, conserved, DUF996 family                              |
| TK1232 | Hypothetical protein, conserved, DUF354 family                                       |
| TK1233 | Hypothetical membrane protein, conserved, DUF95 family                               |
| TK1238 | Hypothetical protein, conserved                                                      |
| TK1240 | Hypothetical membrane protein, conserved                                             |
| TK1241 | Hypothetical protein, conserved                                                      |
| TK1242 | Hypothetical protein, conserved                                                      |
| TK1243 | Hypothetical protein, conserved                                                      |
| TK1245 | Hypothetical protein, conserved                                                      |
| TK1246 | Hypothetical protein, conserved                                                      |
| TK1248 | Hypothetical protein, conserved, DUF126 family                                       |
| TK1249 | Hypothetical protein, conserved, DUF521 family                                       |
| TK1253 | Hypothetical protein, conserved                                                      |
| TK1255 | Hypothetical protein, conserved                                                      |
| TK1258 | Hypothetical membrane protein, conserved, DUF92 family                               |
| TK1263 | Hypothetical protein, conserved                                                      |
| TK1268 | Hypothetical protein, conserved                                                      |
| TK1270 | Hypothetical protein, conserved, containing PRC-barrel domain                        |
| TK1294 | Hypothetical membrane protein, conserved, DUF70 family                               |
| TK1296 | Hypothetical protein, conserved, DUF424 family                                       |
| TK1298 | Hypothetical protein, conserved, DUF1464 family                                      |
| TK1300 | Hypothetical membrane protein, conserved                                             |
| TK1302 | Hypothetical membrane protein, conserved                                             |
| TK1303 | Hypothetical protein, conserved                                                      |
| TK1304 | Hypothetical protein, conserved                                                      |
| TK1312 | Hypothetical protein, conserved, containing V4R domain                               |
| TK1313 | Hypothetical protein, conserved                                                      |
| TK1317 | Hypothetical membrane protein, conserved                                             |
| TK1329 | Hypothetical protein, conserved, DUF257 family                                       |
| TK1333 | Hypothetical membrane protein, conserved                                             |
| TK1335 | Hypothetical protein, conserved, DUF54 family                                        |
| TK1338 | Hypothetical membrane protein, conserved                                             |
| TK1340 | Hypothetical membrane protein, conserved                                             |
| TK1385 | Hypothetical protein, conserved                                                      |
| TK1387 | Hypothetical membrane protein, conserved                                             |
| TK1388 | Hypothetical protein, conserved                                                      |
| TK1390 | Hypothetical protein, conserved                                                      |
| TK1407 | Hypothetical membrane protein, conserved                                             |
| TK1412 | Hypothetical protein, conserved, radical SAM superfamily fused to B12-binding domain |
| TK1422 | Hypothetical protein, conserved, DUF516 family                                       |
| TK1423 | Hypothetical protein, conserved                                                      |
| TK1424 | Hypothetical protein, conserved                                                      |
| TK1425 | Hypothetical protein, conserved                                                      |
| TK1427 | Hypothetical membrane protein, conserved                                             |
| TK1433 | Hypothetical protein, conserved                                                      |
| TK1440 | Hypothetical protein, conserved                                                      |
| TK1453 | Hypothetical protein, conserved                                                      |
| TK1459 | Hypothetical protein, conserved                                                      |



|        |                                                                     |
|--------|---------------------------------------------------------------------|
| TK1463 | Hypothetical protein, conserved                                     |
| TK1464 | Hypothetical protein, conserved                                     |
| TK1475 | Hypothetical protein, conserved, DUF86 family                       |
| TK1477 | Hypothetical protein, conserved, DUF52 family                       |
| TK1480 | Hypothetical protein, conserved                                     |
| TK1483 | Hypothetical protein, conserved                                     |
| TK1484 | Hypothetical protein, conserved                                     |
| TK1488 | Hypothetical protein, conserved, UPF0153 family                     |
| TK1492 | Hypothetical protein, conserved                                     |
| TK1493 | Hypothetical protein, conserved, FUN14 family                       |
| TK1508 | Hypothetical membrane protein, conserved                            |
| TK1510 | Hypothetical protein, conserved                                     |
| TK1511 | Hypothetical protein, conserved, UPF0150 family                     |
| TK1516 | Hypothetical membrane protein, conserved, DUF106 family             |
| TK1543 | Hypothetical protein, conserved, DUF171 family                      |
| TK1545 | Hypothetical protein, conserved, DUF135 family                      |
| TK1552 | Hypothetical membrane protein, conserved                            |
| TK1553 | Hypothetical protein, conserved                                     |
| TK1555 | Hypothetical membrane protein, conserved                            |
| TK1558 | Hypothetical protein, conserved, containing CBS domains             |
| TK1561 | Hypothetical membrane protein, conserved, MarC family               |
| TK1565 | Hypothetical protein, conserved                                     |
| TK1566 | Hypothetical protein, conserved                                     |
| TK1571 | Hypothetical protein, conserved                                     |
| TK1575 | Hypothetical membrane protein, conserved, containing TrkA-C domain  |
| TK1576 | Hypothetical membrane protein, conserved                            |
| TK1577 | Hypothetical membrane protein, conserved                            |
| TK1578 | Hypothetical membrane protein, conserved                            |
| TK1580 | Hypothetical protein, conserved, UPF0153 family                     |
| TK1581 | Hypothetical protein, conserved, UPF0113 family                     |
| TK1586 | Hypothetical membrane protein, conserved                            |
| TK1608 | Hypothetical protein, conserved, DUF257 family                      |
| TK1609 | Hypothetical protein, conserved, DUF257 family                      |
| TK1610 | Hypothetical protein, conserved                                     |
| TK1617 | Hypothetical protein, conserved                                     |
| TK1619 | Hypothetical protein, conserved, DUF1288 family                     |
| TK1626 | Hypothetical protein, conserved, containing CBS domains             |
| TK1629 | Hypothetical protein, conserved                                     |
| TK1630 | Hypothetical protein, conserved, containing ZPR1 zinc-finger domain |
| TK1631 | Hypothetical protein, conserved                                     |
| TK1641 | Hypothetical protein, conserved                                     |
| TK1642 | Hypothetical membrane protein, conserved                            |
| TK1646 | Hypothetical protein, conserved                                     |
| TK1649 | Hypothetical membrane protein, conserved, DUF20 family              |
| TK1651 | Hypothetical protein, conserved                                     |
| TK1653 | Hypothetical membrane protein, conserved                            |
| TK1657 | Hypothetical protein, conserved                                     |
| TK1658 | Hypothetical protein, conserved                                     |
| TK1660 | Hypothetical protein, conserved                                     |
| TK1661 | Hypothetical membrane protein, conserved                            |
| TK1662 | Hypothetical protein, conserved, internal deletion                  |
| TK1663 | Hypothetical protein, conserved, insertion                          |
| TK1664 | Hypothetical protein, conserved, insertion                          |
| TK1665 | Hypothetical protein, conserved                                     |
| TK1666 | Hypothetical protein, conserved                                     |
| TK1667 | Hypothetical membrane protein, conserved, containing DUF361 domain  |
| TK1668 | Hypothetical protein, conserved                                     |
| TK1670 | Hypothetical protein, conserved                                     |
| TK1671 | Hypothetical protein, conserved, radical SAM superfamily            |
| TK1679 | Hypothetical protein, conserved                                     |
| TK1683 | Hypothetical protein, conserved                                     |
| TK1686 | Hypothetical protein, conserved, DUF137 family                      |
| TK1690 | Hypothetical membrane protein, conserved                            |
| TK1691 | Hypothetical protein, conserved, DUF43 family                       |
| TK1693 | Hypothetical protein, conserved, containing DUF59 domain            |
| TK1697 | Hypothetical protein, conserved, DUF359 family                      |
| TK1701 | Hypothetical protein, conserved                                     |
| TK1702 | Hypothetical protein, conserved, DUF1102 family                     |
| TK1704 | Hypothetical protein, conserved                                     |
| TK1705 | Hypothetical protein, conserved                                     |
| TK1706 | Hypothetical protein, conserved                                     |
| TK1710 | Hypothetical protein, conserved, DUF86 family                       |
| TK1725 | Hypothetical membrane protein, conserved                            |
| TK1726 | Hypothetical protein, conserved, flame shift                        |
| TK1727 | Hypothetical protein, conserved, flame shift                        |
| TK1728 | Hypothetical membrane protein, conserved                            |
| TK1729 | Hypothetical membrane protein, conserved                            |
| TK1735 | Hypothetical protein, conserved                                     |
| TK1740 | Hypothetical membrane protein, conserved                            |
| TK1743 | Hypothetical protein, conserved                                     |
| TK1744 | Hypothetical protein, conserved                                     |
| TK1746 | Hypothetical protein, conserved                                     |
| TK1747 | Hypothetical protein, conserved, DUF84 family                       |

|        |                                                                                          |
|--------|------------------------------------------------------------------------------------------|
| TK1750 | Hypothetical protein, conserved                                                          |
| TK1752 | Hypothetical protein, conserved, DUF217 family                                           |
| TK1753 | Hypothetical membrane protein, conserved                                                 |
| TK1762 | Hypothetical protein, conserved                                                          |
| TK1766 | Hypothetical protein, conserved, radical SAM superfamily                                 |
| TK1776 | Hypothetical protein, conserved, UPF0146 family                                          |
| TK1780 | Hypothetical protein, conserved                                                          |
| TK1786 | Hypothetical protein, conserved                                                          |
| TK1787 | Hypothetical membrane protein, conserved, DUF112 family                                  |
| TK1788 | Hypothetical protein, conserved                                                          |
| TK1793 | Hypothetical membrane protein, conserved                                                 |
| TK1794 | Hypothetical membrane protein, conserved                                                 |
| TK1795 | Hypothetical protein, conserved, DUF61 family                                            |
| TK1799 | Hypothetical membrane protein, conserved                                                 |
| TK1807 | Hypothetical protein, conserved, radical SAM superfamily                                 |
| TK1808 | Hypothetical membrane protein, conserved                                                 |
| TK1812 | Hypothetical membrane protein, conserved, DUF131 family                                  |
| TK1816 | Hypothetical protein, conserved, flame shift                                             |
| TK1818 | Hypothetical protein, conserved                                                          |
| TK1823 | Hypothetical protein, conserved                                                          |
| TK1824 | Hypothetical protein, conserved                                                          |
| TK1825 | Hypothetical membrane protein, conserved                                                 |
| TK1832 | Hypothetical membrane protein, conserved                                                 |
| TK1833 | Hypothetical protein, conserved, containing DUF460 family                                |
| TK1837 | Hypothetical protein, conserved, DUF1530 family                                          |
| TK1839 | Hypothetical protein, conserved                                                          |
| TK1844 | Hypothetical membrane protein, conserved                                                 |
| TK1845 | Hypothetical membrane protein, conserved, containing DUF58 domain                        |
| TK1847 | Hypothetical membrane protein, conserved                                                 |
| TK1848 | Hypothetical membrane protein, conserved                                                 |
| TK1849 | Hypothetical protein, conserved                                                          |
| TK1851 | Hypothetical membrane protein, conserved                                                 |
| TK1852 | Hypothetical membrane protein, conserved                                                 |
| TK1854 | Hypothetical protein, conserved                                                          |
| TK1855 | Hypothetical protein, conserved, DUF515 family                                           |
| TK1856 | Hypothetical protein, conserved                                                          |
| TK1871 | Hypothetical protein, conserved                                                          |
| TK1873 | Hypothetical protein, conserved                                                          |
| TK1875 | Hypothetical protein, conserved, DUF104 family                                           |
| TK1882 | Hypothetical protein, conserved, DUF211 family                                           |
| TK1888 | Hypothetical membrane protein, conserved                                                 |
| TK1892 | Hypothetical protein, conserved, DUF553 family fused to N-terminal membrane-bound domain |
| TK1896 | Hypothetical protein, conserved, DUF75 family                                            |
| TK1897 | Hypothetical protein, conserved, DUF473 family                                           |
| TK1898 | Hypothetical protein, conserved, DUF91 family                                            |
| TK1904 | Hypothetical protein, conserved                                                          |
| TK1905 | Hypothetical protein, conserved                                                          |
| TK1907 | Hypothetical protein, conserved, DUF207 family                                           |
| TK1911 | Hypothetical protein, conserved                                                          |
| TK1920 | Hypothetical protein, conserved                                                          |
| TK1921 | Hypothetical membrane protein, conserved, flame shift                                    |
| TK1922 | Hypothetical membrane protein, conserved, flame shift                                    |
| TK1923 | Hypothetical membrane protein, conserved                                                 |
| TK1925 | Hypothetical membrane protein, conserved                                                 |
| TK1926 | Hypothetical protein, conserved, DUF74 family                                            |
| TK1927 | Hypothetical membrane protein, conserved                                                 |
| TK1929 | Hypothetical protein, conserved                                                          |
| TK1931 | Hypothetical protein, conserved                                                          |
| TK1934 | Hypothetical protein, conserved                                                          |
| TK1937 | Hypothetical membrane protein, conserved                                                 |
| TK1939 | Hypothetical protein, conserved                                                          |
| TK1941 | Hypothetical protein, conserved, DUF432 family                                           |
| TK1942 | Hypothetical protein, conserved                                                          |
| TK1943 | Hypothetical protein, conserved, containing DUF434 domain                                |
| TK1953 | Hypothetical protein, conserved                                                          |
| TK1956 | Hypothetical protein, conserved, containing ATP/GTP-binding site motif A                 |
| TK1958 | Hypothetical protein, conserved                                                          |
| TK1972 | Hypothetical membrane protein, conserved, containing TPR-repeat domains                  |
| TK1975 | Hypothetical protein, conserved                                                          |
| TK1989 | Hypothetical protein, conserved (C-terminus)                                             |
| TK1991 | Hypothetical protein, conserved                                                          |
| TK1998 | Hypothetical protein, conserved                                                          |
| TK2006 | Hypothetical protein, conserved                                                          |
| TK2014 | Hypothetical membrane protein, conserved, DUF81 family                                   |
| TK2022 | Hypothetical membrane protein, conserved                                                 |
| TK2023 | Hypothetical protein, conserved                                                          |
| TK2025 | Hypothetical protein, conserved                                                          |
| TK2030 | Hypothetical protein, conserved                                                          |
| TK2033 | Hypothetical protein, conserved, DUF99 family                                            |
| TK2038 | Hypothetical protein, conserved, DUF531 family                                           |
| TK2039 | Hypothetical protein, conserved, containing TPR-repeat domain                            |
| TK2041 | Hypothetical protein, conserved                                                          |
| TK2043 | Hypothetical protein, conserved, DUF257 family                                           |

TK2044 Hypothetical protein, conserved, DUF257 family  
 TK2047 Hypothetical membrane protein, conserved, DUF112 family  
 TK2050 Hypothetical membrane protein, conserved  
 TK2051 Hypothetical protein, conserved  
 TK2063 Hypothetical protein, conserved, cupin superfamily  
 TK2068 Hypothetical protein, conserved  
 TK2102 Hypothetical membrane protein, conserved, DUF1393 family  
 TK2103 Hypothetical protein, conserved  
 TK2105 Hypothetical protein, conserved  
 TK2108 Hypothetical membrane protein, conserved  
 TK2112 Hypothetical protein, conserved, DUF355 family  
 TK2113 Hypothetical protein, conserved  
 TK2114 Hypothetical protein, conserved  
 TK2119 Hypothetical membrane protein, conserved, DUF46 family  
 TK2120 Hypothetical protein, conserved, containing DUF1511 family  
 TK2121 Hypothetical protein, conserved  
 TK2123 Hypothetical membrane protein, conserved, UPF0104 family  
 TK2125 Hypothetical membrane protein, conserved, containing DUF835 family  
 TK2131 Hypothetical protein, conserved, UPF0147 family  
 TK2133 Hypothetical protein, conserved  
 TK2136 Hypothetical protein, conserved  
 TK2139 Hypothetical membrane protein, conserved  
 TK2144 Hypothetical protein, conserved  
 TK2145 Hypothetical protein, conserved, radical SAM superfamily  
 TK2146 Hypothetical protein, conserved  
 TK2148 Hypothetical protein, conserved  
 TK2152 Hypothetical protein, conserved, DUF431 family  
 TK2153 Hypothetical protein, conserved  
 TK2154 Hypothetical protein, conserved, UPF0175 family  
 TK2157 Hypothetical protein, conserved  
 TK2160 Hypothetical protein, conserved, radical SAM superfamily  
 TK2162 Hypothetical membrane protein, conserved  
 TK2165 Hypothetical protein, conserved  
 TK2171 Hypothetical protein, conserved, DUF257 family  
 TK2173 Hypothetical protein, conserved  
 TK2179 Hypothetical protein, conserved, BtpA family  
 TK2180 Hypothetical protein, conserved  
 TK2183 Hypothetical protein, conserved  
 TK2184 Hypothetical protein, conserved  
 TK2187 Hypothetical membrane protein, conserved  
 TK2188 Hypothetical membrane protein, conserved  
 TK2191 Hypothetical protein, conserved  
 TK2193 Hypothetical protein, conserved  
 TK2194 Hypothetical membrane protein, conserved  
 TK2198 Hypothetical protein, conserved, UPF0047 family  
 TK2200 Hypothetical protein, conserved  
 TK2203 Hypothetical protein, conserved  
 TK2204 Hypothetical protein, conserved  
 TK2206 Hypothetical protein, conserved  
 TK2216 Hypothetical membrane protein, conserved  
 TK2224 Hypothetical membrane protein, conserved, containing DUF835 domain  
 TK2226 Hypothetical protein, conserved  
 TK2233 Hypothetical protein, conserved, DUF437 family  
 TK2234 Hypothetical membrane protein, conserved  
 TK2236 Hypothetical protein, conserved  
 TK2237 Hypothetical protein, conserved, DUF366 family  
 TK2238 Hypothetical membrane protein, conserved  
 TK2243 Hypothetical protein, conserved, DUF1464 family  
 TK2249 Hypothetical protein, conserved, containing TPR-repeat domain, N-truncation  
 TK2256 Hypothetical membrane protein, conserved  
 TK2267 Hypothetical membrane protein, conserved, UPF0016 family  
 TK2269 Hypothetical protein, conserved, DUF509 family  
 TK2270 Hypothetical protein, conserved  
 TK2277 Hypothetical protein, conserved  
 TK2282 Hypothetical membrane protein, conserved  
 TK2283 Hypothetical protein, conserved, DUF498 family  
 TK2293 Hypothetical protein, conserved, DUF371 family  
 TK2294 Hypothetical protein, conserved, UPF0128 family  
 TK2296 Hypothetical protein, conserved, radical SAM superfamily  
 TK2297 Hypothetical protein, conserved, containing TPR-repeat domains

#### Hypothetical proteins

TK0010 Hypothetical protein  
 TK0057 Hypothetical protein  
 TK0118 Hypothetical protein  
 TK0124 Hypothetical protein  
 TK0127 Hypothetical protein  
 TK0138 Hypothetical protein  
 TK0162 Hypothetical membrane protein  
 TK0165 Hypothetical protein  
 TK0166 Hypothetical protein  
 TK0209 Hypothetical protein  
 TK0220 Hypothetical membrane protein  
 TK0229 Hypothetical protein

|        |                                                                |
|--------|----------------------------------------------------------------|
| TK0236 | Hypothetical protein                                           |
| TK0237 | Hypothetical membrane protein                                  |
| TK0294 | Hypothetical membrane protein                                  |
| TK0300 | Hypothetical membrane protein                                  |
| TK0301 | Hypothetical membrane protein                                  |
| TK0321 | Hypothetical protein                                           |
| TK0344 | Hypothetical protein                                           |
| TK0353 | Hypothetical protein                                           |
| TK0362 | Hypothetical protein                                           |
| TK0369 | Hypothetical membrane protein                                  |
| TK0371 | Hypothetical protein                                           |
| TK0372 | Hypothetical protein                                           |
| TK0426 | Hypothetical protein                                           |
| TK0427 | Hypothetical protein                                           |
| TK0437 | Hypothetical protein                                           |
| TK0438 | Hypothetical protein                                           |
| TK0443 | Hypothetical membrane protein                                  |
| TK0496 | Hypothetical membrane protein                                  |
| TK0516 | Hypothetical protein                                           |
| TK0520 | Hypothetical protein, containing leucine zipper motif          |
| TK0530 | Hypothetical protein                                           |
| TK0531 | Hypothetical protein                                           |
| TK0532 | Hypothetical protein                                           |
| TK0543 | Hypothetical protein                                           |
| TK0552 | Hypothetical protein                                           |
| TK0555 | Hypothetical protein                                           |
| TK0564 | Hypothetical protein                                           |
| TK0647 | Hypothetical protein                                           |
| TK0662 | Hypothetical protein                                           |
| TK0680 | Hypothetical membrane protein                                  |
| TK0681 | Hypothetical protein                                           |
| TK0709 | Hypothetical protein                                           |
| TK0753 | Hypothetical membrane protein                                  |
| TK0766 | Hypothetical membrane protein                                  |
| TK0780 | Hypothetical protein                                           |
| TK0782 | Hypothetical protein                                           |
| TK0785 | Hypothetical protein                                           |
| TK0792 | Hypothetical protein                                           |
| TK0818 | Hypothetical protein                                           |
| TK0820 | Hypothetical protein                                           |
| TK0823 | Hypothetical membrane protein                                  |
| TK0847 | Hypothetical protein, containing leucine zipper motif          |
| TK0848 | Hypothetical protein                                           |
| TK0860 | Hypothetical protein                                           |
| TK0869 | Hypothetical protein                                           |
| TK0905 | Hypothetical membrane protein                                  |
| TK0912 | Hypothetical membrane protein, containing leucine zipper motif |
| TK0913 | Hypothetical protein                                           |
| TK0919 | Hypothetical protein                                           |
| TK0920 | Hypothetical protein                                           |
| TK0923 | Hypothetical protein                                           |
| TK0926 | Hypothetical protein                                           |
| TK0936 | Hypothetical protein                                           |
| TK0938 | Hypothetical protein, containing ATP/GTP-binding site motif A  |
| TK0980 | Hypothetical membrane protein                                  |
| TK0982 | Hypothetical membrane protein                                  |
| TK0983 | Hypothetical protein                                           |
| TK0985 | Hypothetical protein                                           |
| TK0988 | Hypothetical protein                                           |
| TK1000 | Hypothetical membrane protein                                  |
| TK1024 | Hypothetical membrane protein                                  |
| TK1051 | Hypothetical protein                                           |
| TK1052 | Hypothetical protein                                           |
| TK1070 | Hypothetical protein                                           |
| TK1075 | Hypothetical protein                                           |
| TK1089 | Hypothetical protein                                           |
| TK1117 | Hypothetical protein                                           |
| TK1132 | Hypothetical membrane protein                                  |
| TK1133 | Hypothetical protein                                           |
| TK1134 | Hypothetical membrane protein                                  |
| TK1154 | Hypothetical protein                                           |
| TK1156 | Hypothetical protein                                           |
| TK1159 | Hypothetical protein                                           |
| TK1160 | Hypothetical membrane protein                                  |
| TK1200 | Hypothetical membrane protein                                  |
| TK1229 | Hypothetical protein                                           |
| TK1244 | Hypothetical protein                                           |
| TK1265 | Hypothetical membrane protein                                  |
| TK1271 | Hypothetical membrane protein                                  |
| TK1277 | Hypothetical membrane protein                                  |
| TK1279 | Hypothetical protein                                           |
| TK1306 | Hypothetical membrane protein                                  |
| TK1308 | Hypothetical protein                                           |

|        |                                                               |
|--------|---------------------------------------------------------------|
| TK1327 | Hypothetical membrane protein                                 |
| TK1341 | Hypothetical membrane protein                                 |
| TK1381 | Hypothetical protein                                          |
| TK1384 | Hypothetical protein                                          |
| TK1389 | Hypothetical protein                                          |
| TK1394 | Hypothetical protein                                          |
| TK1409 | Hypothetical membrane protein                                 |
| TK1430 | Hypothetical protein                                          |
| TK1437 | Hypothetical membrane protein                                 |
| TK1441 | Hypothetical protein                                          |
| TK1462 | Hypothetical membrane protein                                 |
| TK1485 | Hypothetical protein                                          |
| TK1490 | Hypothetical protein                                          |
| TK1564 | Hypothetical protein                                          |
| TK1570 | Hypothetical protein                                          |
| TK1582 | Hypothetical membrane protein                                 |
| TK1583 | Hypothetical protein                                          |
| TK1584 | Hypothetical membrane protein                                 |
| TK1585 | Hypothetical protein                                          |
| TK1587 | Hypothetical membrane protein                                 |
| TK1616 | Hypothetical protein                                          |
| TK1628 | Hypothetical protein                                          |
| TK1632 | Hypothetical membrane protein                                 |
| TK1638 | Hypothetical membrane protein                                 |
| TK1645 | Hypothetical protein                                          |
| TK1647 | Hypothetical protein                                          |
| TK1648 | Hypothetical protein                                          |
| TK1672 | Hypothetical protein                                          |
| TK1678 | Hypothetical membrane protein                                 |
| TK1680 | Hypothetical protein                                          |
| TK1682 | Hypothetical protein                                          |
| TK1707 | Hypothetical protein                                          |
| TK1724 | Hypothetical protein, containing ATP/GTP-binding site motif A |
| TK1730 | Hypothetical membrane protein                                 |
| TK1739 | Hypothetical protein                                          |
| TK1742 | Hypothetical protein                                          |
| TK1749 | Hypothetical protein                                          |
| TK1783 | Hypothetical membrane protein                                 |
| TK1834 | Hypothetical protein                                          |
| TK1838 | Hypothetical membrane protein                                 |
| TK1862 | Hypothetical protein                                          |
| TK1879 | Hypothetical protein                                          |
| TK1885 | Hypothetical protein                                          |
| TK1887 | Hypothetical membrane protein                                 |
| TK1889 | Hypothetical membrane protein                                 |
| TK1894 | Hypothetical membrane protein                                 |
| TK1906 | Hypothetical protein                                          |
| TK1918 | Hypothetical membrane protein                                 |
| TK1919 | Hypothetical membrane protein                                 |
| TK1930 | Hypothetical protein                                          |
| TK1947 | Hypothetical membrane protein                                 |
| TK1948 | Hypothetical membrane protein                                 |
| TK1949 | Hypothetical protein                                          |
| TK1950 | Hypothetical protein                                          |
| TK1969 | Hypothetical membrane protein                                 |
| TK1985 | Hypothetical membrane protein                                 |
| TK1986 | Hypothetical protein                                          |
| TK1987 | Hypothetical protein                                          |
| TK1988 | Hypothetical protein, containing leucine zipper motif         |
| TK1996 | Hypothetical protein                                          |
| TK2003 | Hypothetical protein                                          |
| TK2013 | Hypothetical protein                                          |
| TK2046 | Hypothetical membrane protein                                 |
| TK2048 | Hypothetical protein                                          |
| TK2056 | Hypothetical membrane protein                                 |
| TK2059 | Hypothetical protein                                          |
| TK2116 | Hypothetical protein                                          |
| TK2174 | Hypothetical protein                                          |
| TK2175 | Hypothetical protein                                          |
| TK2176 | Hypothetical protein                                          |
| TK2177 | Hypothetical membrane protein                                 |
| TK2178 | Hypothetical protein, containing ATP/GTP-binding site motif A |
| TK2182 | Hypothetical protein                                          |
| TK2189 | Hypothetical membrane protein                                 |
| TK2199 | Hypothetical protein                                          |
| TK2201 | Hypothetical membrane protein                                 |
| TK2221 | Hypothetical protein                                          |
| TK2230 | Hypothetical protein                                          |
| TK2265 | Hypothetical membrane protein                                 |
| TK2295 | Hypothetical membrane protein                                 |
| TK2305 | Hypothetical protein, containing leucine zipper motif         |

---
