# Supplementary material for: Complete genome sequence of the hyperthermophilic archaeon Thermococcus kodakaraensis KOD1 and comparison with Pyrococcus genomes
Source: HighWire-hosted journal article supplement (doi:10.1101/gr.3003105), 2005-02-14
Supplement: SupplTable2.pdf [file SupplTable2.pdf]

Supplemental Table 2. Unique or additional proteins in *T. kodakaraensis* in comparison among the order Thermococcales

|                                        |                                                                                |
|----------------------------------------|--------------------------------------------------------------------------------|
| <b>DNA metabolism</b>                  |                                                                                |
| TK0096                                 | DNA replication licensing factor, MCM2/3/5 family [TKV1]                       |
| TK0582                                 | DNA polymerase sliding clamp (proliferating cell nuclear antigen) [TKV3]       |
| TK1361                                 | DNA replication licensing factor, MCM2/3/5 family [TKV4]                       |
| TK0447                                 | Hypothetical protein, conserved, RAMP superfamily                              |
| TK0794                                 | Putative 5-methylcytosine restriction system, catalytic subunit                |
| TK0795                                 | Putative 5-methylcytosine restriction system, GTPase subunit                   |
| TK1009                                 | Putative 5-methylcytosine restriction system, GTPase subunit                   |
| TK1010                                 | Putative 5-methylcytosine restriction system, catalytic subunit                |
| TK1158                                 | Predicted endonuclease-methyltransferase fusion protein                        |
| TK1460                                 | Predicted endonuclease-methyltransferase fusion protein                        |
| <b>Transcription</b>                   |                                                                                |
| TK2287                                 | Transcription initiation factor IIB                                            |
| <b>Translation</b>                     |                                                                                |
| TK0773                                 | Predicted ATP-dependent endonuclease, OLD family                               |
| TK1395                                 | Predicted ATP-dependent endonuclease, OLD family                               |
| TK1970                                 | Probable tRNA/rRNA methyltransferase, SpoU family                              |
| TK0306                                 | DEAD/DEAH box RNA helicase                                                     |
| <b>Cellular processes</b>              |                                                                                |
| TK2137                                 | ATPase involved in chromosome partitioning, ParA/MinD family                   |
| TK0039                                 | Archaeal flagellin B2 precursor                                                |
| TK0156                                 | Methyl-accepting chemotaxis protein                                            |
| TK0638                                 | Methyl-accepting chemotaxis protein                                            |
| TK0630                                 | Methyl-accepting chemotaxis protein                                            |
| TK1055                                 | Peroxiredoxin, bacterioferritin comigratory protein homolog, AhpC/TSA family   |
| <b>Protein fate</b>                    |                                                                                |
| TK0678                                 | Chaperonin, alpha subunit (thermosome, alpha subunit)                          |
| TK1121                                 | Prefoldin, alpha subunit                                                       |
| TK1122                                 | Prefoldin, beta subunit                                                        |
| TK1850                                 | FKBP-type peptidyl-prolyl cis-trans isomerase                                  |
| TK0290                                 | Pyruvate-formate lyase-activating enzyme                                       |
| TK0819                                 | Peptide methionine sulfoxide reductase                                         |
| TK0961                                 | Hydrogenase expression/formation protein HypE                                  |
| <b>Regulatory functions</b>            |                                                                                |
| TK0017                                 | Predicted transcription regulator, SpoVT/AbrB family                           |
| TK0086                                 | Predicted transcription regulator, ArsR family [TKV1]                          |
| TK0094                                 | Transcription regulator, SpoVT/AbrB family [TKV1]                              |
| TK0168                                 | Predicted transcription regulator, Lrp/AsnC family                             |
| TK0405                                 | Predicted transcription regulator, SpoVT/AbrB family [TKV2]                    |
| TK0406                                 | Predicted transcription regulator, SpoVT/AbrB family [TKV2]                    |
| TK0559                                 | Transcription regulator, ArsR family                                           |
| TK0697                                 | Predicted transcription regulator, containing DNA-binding HTH domain           |
| TK0770                                 | Transcription regulator, PadR-like family                                      |
| TK0834                                 | Transcription regulator, Lrp/AsnC family                                       |
| TK0888                                 | Transcription regulator, SpoVT/AbrB family                                     |
| TK1076                                 | Transcription regulator, SpoVT/AbrB family                                     |
| TK1372                                 | Predicted transcription regulator, SpoVT/AbrB family [TKV4]                    |
| TK1815                                 | Transcription regulator, CopG/RepA family                                      |
| TK2107                                 | Transcription regulator, PadR-like family                                      |
| TK2190                                 | Predicted transcription regulator, ArsR family                                 |
| TK2261                                 | Transcription regulator, SpoVT/AbrB family                                     |
| TK1435                                 | Nitrogen regulatory protein P-II                                               |
| <b>Cell envelope</b>                   |                                                                                |
| TK0219                                 | Sugar-phosphate nucleotidyltransferase                                         |
| TK1293                                 | Putative membrane-bound dolichyl-phosphate-mannose-protein mannosyltransferase |
| TK1713                                 | Glycosyltransferase, family 4                                                  |
| TK1719                                 | Capsular polysaccharide biosynthesis protein                                   |
| TK1720                                 | Dolichol-phosphate mannosyltransferase                                         |
| TK1721                                 | Glycosyltransferase, family 4                                                  |
| TK1723                                 | Glycosyltransferase, family 4                                                  |
| TK2255                                 | Bifunctional phosphatase/dolichol-phosphate glucosyltransferase                |
| TK0164                                 | S-layer-like array protein                                                     |
| TK1589                                 | S-layer-like array protein                                                     |
| <b>Central intermediary metabolism</b> |                                                                                |
| TK0076                                 | Subtilisin-like serine protease precursor [TKV1]                               |
| TK1675                                 | Subtilisin-like serine protease precursor                                      |
| TK1782                                 | Serine protease inhibitor Serpin homolog                                       |
| TK0977                                 | Pullulanase type II, GH13 family                                               |
| TK1765                                 | Chitinase, containing dual catalytic domains                                   |
| TK1398                                 | Glycerophosphoryl diester phosphodiesterase                                    |
| <b>Amino acid metabolism</b>           |                                                                                |
| TK0240                                 | Arginase                                                                       |

**Nucleotide metabolism**

|        |                                                         |
|--------|---------------------------------------------------------|
| TK0430 | Inosine 5'-monophosphate cyclohydrolase                 |
| TK0432 | Phosphoribosylaminoimidazolesuccinocarboxamide synthase |
| TK1640 | Nucleotide pyrophosphohydrolase                         |
| TK1318 | Thymidine kinase                                        |
| TK1479 | Uridine phosphorylase                                   |

**Cofactor and prosthetic group metabolism**

|        |                                         |
|--------|-----------------------------------------|
| TK1324 | 4-Hydroxybenzoate octaprenyltransferase |
|--------|-----------------------------------------|

**Energy metabolism**

|        |                                                                                             |
|--------|---------------------------------------------------------------------------------------------|
| TK1777 | Phosphopentomutase                                                                          |
| TK2104 | Deoxyribose-phosphate aldolase                                                              |
| TK0289 | Pyruvate-formate lyase                                                                      |
| TK0072 | Tungsten-containing oxidoreductase                                                          |
| TK0370 | NAD(P)H-flavin oxidoreductase                                                               |
| TK0740 | 4Fe-4S cluster-binding protein                                                              |
| TK1062 | Rubryerythrin-related protein                                                               |
| TK1481 | NADH:polysulfide oxidoreductase                                                             |
| TK1612 | Glutamate synthase beta chain-related oxidoreductase, containing 2Fe-2S and 4Fe-4S clusters |
| TK1613 | NADH:ubiquinone oxidoreductase, NADH-binding subunit F                                      |
| TK1614 | NADH:ubiquinone oxidoreductase, subunit E                                                   |
| TK2012 | Ferredoxin 3                                                                                |
| TK2073 | 4Fe-4S cluster-binding protein                                                              |
| TK2074 | Glutamate synthase beta chain-related oxidoreductase                                        |
| TK2076 | Probable formate dehydrogenase, alpha subunit                                               |
| TK2094 | Rubryerythrin-related protein                                                               |
| TK2095 | Rubryerythrin-related protein                                                               |

**Transport and binding proteins**

|        |                                                                                                                   |
|--------|-------------------------------------------------------------------------------------------------------------------|
| TK0761 | Sodium/phosphate symporter                                                                                        |
| TK0570 | ABC-type iron(III) transport system, periplasmic component                                                        |
| TK0571 | ABC-type iron(III) transport system, permease component                                                           |
| TK0572 | ABC-type iron(III) transport system, ATPase component                                                             |
| TK0621 | Multisubunit sodium/hydrogen antiporter, predicted subunit                                                        |
| TK0622 | Multisubunit sodium/hydrogen antiporter, predicted subunit                                                        |
| TK0627 | NapA-type sodium/hydrogen antiporter                                                                              |
| TK0706 | ABC-type iron(III)-siderophore transport system, periplasmic component fused to N-terminal uncharacterized domain |
| TK0707 | ABC-type iron(III)-siderophore transport system, permease component                                               |
| TK0708 | ABC-type iron(III)-siderophore transport system, ATPase component                                                 |
| TK0714 | Iron(II) transport protein B                                                                                      |
| TK0715 | Iron(II) transport protein A                                                                                      |
| TK0716 | Iron(II) transport protein A                                                                                      |
| TK0717 | ABC-type molybdate transport system, periplasmic component                                                        |
| TK0718 | ABC-type molybdate transport system, permease component                                                           |
| TK0719 | ABC-type molybdate transport system, ATPase component                                                             |
| TK1900 | Calcium-gated potassium channel protein                                                                           |
| TK0295 | Predicted sodium-dependent transporter                                                                            |
| TK0935 | TRAP-type transporter, periplasmic component                                                                      |
| TK0937 | TRAP-type transporter, fused permease components                                                                  |
| TK2079 | Probable formate transporter                                                                                      |
| TK0684 | Aromatic amino acid permease                                                                                      |
| TK1859 | Probable lipoprotein releasing system, ATP-binding protein                                                        |
| TK2057 | ABC-type dipeptide/oligopeptide transport system, permease component                                              |
| TK2058 | ABC-type dipeptide/oligopeptide transport system, permease component                                              |
| TK0161 | ABC-type multidrug transport system, ATPase component                                                             |
| TK0231 | ABC-type multidrug transport system, permease component                                                           |
| TK0235 | Predicted permease, major facilitator superfamily                                                                 |
| TK0657 | ABC-type transport system, probable periplasmic component                                                         |
| TK0726 | ABC-type multidrug transport system, permease component                                                           |
| TK0833 | Predicted permease, major facilitator superfamily                                                                 |
| TK0942 | ABC-type multidrug transport system, ATPase component                                                             |
| TK1579 | ABC-type multidrug transport system, ATPase component                                                             |
| TK1588 | ABC-type multidrug transport system, ATPase component                                                             |
| TK1858 | Predicted permease, containing FtsX domains                                                                       |
| TK1992 | Permease, major facilitator superfamily                                                                           |
| TK2053 | ABC-type multidrug transport system, ATPase component                                                             |
| TK2054 | ABC-type transport system, probable permease component                                                            |
| TK2055 | ABC-type transport system, probable permease component                                                            |
| TK2161 | ABC-type multidrug transport system, ATPase component                                                             |

**General function prediction only**

|        |                                                    |
|--------|----------------------------------------------------|
| TK0591 | Predicted N-acetyltransferase, GNAT family [TKV3]  |
| TK0394 | Predicted ATPase, AAA superfamily [TKV2]           |
| TK0776 | Archaeal ATPase                                    |
| TK1048 | ATPase, RecA superfamily                           |
| TK1356 | Predicted ATPase, AAA superfamily [TKV4]           |
| TK1573 | Archaeal ATPase, fused to C-terminal DUF234 domain |
| TK1822 | Predicted ATPase, AAA superfamily                  |
| TK1910 | ATPase, RecA superfamily                           |
| TK2202 | Predicted ATPase, AAA superfamily                  |
| TK2220 | Archaeal ATPase                                    |

|        |                                                                      |
|--------|----------------------------------------------------------------------|
| TK0016 | Predicted nucleic acid-binding protein, containing PIN domain        |
| TK0066 | Predicted nucleic acid-binding protein, containing PIN domain        |
| TK0128 | Predicted nucleic acid-binding protein, containing PIN domain        |
| TK0137 | Predicted nucleic acid-binding protein, containing PIN domain        |
| TK0191 | Predicted nucleic acid-binding protein, containing PIN domain        |
| TK0212 | Predicted nucleic acid-binding protein, containing PIN domain        |
| TK0334 | Predicted nucleic acid-binding protein, containing PIN domain        |
| TK0343 | Predicted nucleic acid-binding protein, containing PIN domain        |
| TK0542 | Predicted nucleic acid-binding protein, containing PIN domain        |
| TK0889 | Predicted nucleic acid-binding protein, containing PIN domain        |
| TK0910 | Predicted nucleic acid-binding protein, containing PIN domain        |
| TK0924 | Predicted nucleic acid-binding protein, containing PIN domain        |
| TK1014 | Predicted nucleic acid-binding protein, containing PIN domain        |
| TK1027 | Predicted nucleic acid-binding protein, containing PIN domain        |
| TK1343 | Predicted nucleic acid-binding protein, containing PIN domain [TKV4] |
| TK1644 | Predicted nucleic acid-binding protein, containing PIN domain        |
| TK1995 | Predicted nucleic acid-binding protein, containing PIN domain        |
| TK2005 | Predicted nucleic acid-binding protein, containing PIN domain        |
| TK2067 | Predicted nucleic acid-binding protein, containing PIN domain        |
| TK2155 | Predicted nucleic acid-binding protein, containing PIN domain        |
| TK2262 | Predicted nucleic acid-binding protein, containing PIN domain        |
| TK2306 | Predicted nucleic acid-binding protein, containing PIN domain        |
| TK0029 | Zinc-dependent hydrolase, glyoxylase II family                       |
| TK0303 | Membrane-bound metal-dependent hydrolase                             |
| TK0312 | Metal-dependent phosphohydrolase, HD superfamily                     |
| TK0365 | Membrane-bound phosphoesterase, PAP2 superfamily                     |
| TK0574 | Metallophosphoesterase, calcineurin superfamily                      |
| TK0758 | Metal-dependent amidohydrolase                                       |
| TK0968 | Predicted hydrolase, HAD superfamily                                 |
| TK1137 | Acid phosphatase SurE homolog                                        |
| TK1944 | Predicted metal-dependent phosphohydrolase, HD superfamily           |
| TK2062 | Metallophosphoesterase, calcineurin superfamily                      |
| TK2166 | ArgE/DapE-related deacylase                                          |
| TK0234 | Predicted SAM-dependent methyltransferase                            |
| TK0063 | Nucleotidyltransferase, fused to N-terminal DNA-binding domain       |
| TK0341 | Nucleotidyltransferase, fused to N-terminal DNA-binding domain       |
| TK0674 | Nucleotidyltransferase                                               |
| TK0962 | Nucleotidyltransferase                                               |
| TK1128 | Nucleotidyltransferase                                               |
| TK1476 | Nucleotidyltransferase                                               |
| TK1994 | Nucleotidyltransferase                                               |
| TK0187 | Predicted glutamine amidotransferase, class I                        |
| TK1843 | Carbohydrate/pyrimidine kinase, PfkB family                          |

#### Unknown function

|        |                                                                        |
|--------|------------------------------------------------------------------------|
| TK0200 | Phosphoenolpyruvate synthetase-related protein                         |
| TK0228 | Met-10+ like protein (C-terminus)                                      |
| TK0831 | Peroxioredoxin-related protein (C-terminus)                            |
| TK1189 | Bacitracin resistance protein BacA homolog                             |
| TK1382 | Dopamine beta hydroxylase-related protein, containing DOMON domain     |
| TK1563 | Phospholipase D-related protein                                        |
| TK1893 | Glycerate kinase-related protein, containing MOFRL domain (C-terminus) |
| TK1974 | Carboxymuconolactone decarboxylase-related protein                     |
| TK2181 | Predicted calcium-binding protein                                      |
| TK2264 | Predicted calcium-binding protein                                      |

#### Mobile elements

|        |                                    |
|--------|------------------------------------|
| TK0298 | Probable transposase               |
| TK0931 | Probable transposase               |
| TK0932 | IS200-like transposase             |
| TK0104 | Probable integrase/recombinase     |
| TK0105 | SSV1 integrase homolog, N-fragment |
| TK0381 | SSV1 integrase homolog, C-fragment |
| TK0421 | Predicted integrase, N-fragment    |
| TK0614 | SSV1 integrase homolog, C-fragment |
| TK1342 | Predicted integrase, C-fragment    |
| TK1378 | Predicted integrase, N-fragment    |

#### Hypothetical proteins, conserved

|              |                                           |
|--------------|-------------------------------------------|
| 166 proteins | Hypothetical proteins, conserved          |
| 23 proteins  | Hypothetical proteins, conserved [TKV1-4] |

#### Hypothetical proteins

|              |                                |
|--------------|--------------------------------|
| 176 proteins | Hypothetical proteins          |
| 84 proteins  | Hypothetical proteins [TKV1-4] |

#### Frame shift, truncation, or fusion with unknown region

41 proteins
